# Supplementary material for: Recent advances in bifunctional synthesis gas conversion to chemicals and fuels with a comparison to monofunctional processes
Source: Royal Society of Chemistry journal article supplement (doi:10.1039/d4cy00437j), 2024-01-01
Supplement: d4cy00437j1.pdf [file d4cy00437j1.pdf]

## **Recent advances in bifunctional synthesis gas conversion to chemicals and fuels with a comparison to monofunctional processes**

J.L. Weber, C. Hernández Mejía, K.P. de Jong, P.E. de Jongh

Content

|                                                    |    |
|----------------------------------------------------|----|
| <b>List of Tables</b> .....                        | 2  |
| <b>List of Figures</b> .....                       | 2  |
| <b>1. DME</b> .....                                | 3  |
| <b>2. Olefins</b> .....                            | 8  |
| <b>3. Aromatics</b> .....                          | 16 |
| <b>4. Gasoline</b> .....                           | 24 |
| <b>4.1. Octane number</b> .....                    | 24 |
| <b>4.2. Analysis of published literature</b> ..... | 27 |
| <b>5. References</b> .....                         | 38 |

## List of Tables

|                                                                                                                                                                                                            |    |
|------------------------------------------------------------------------------------------------------------------------------------------------------------------------------------------------------------|----|
| <b>Table S1:</b> reported catalytic performance of bifunctional catalysts for the direct conversion of synthesis gas to DME.....                                                                           | 4  |
| <b>Table S2:</b> reported catalytic performance of bifunctional catalysts for the direct conversion of synthesis gas to DME using <i>in-situ</i> water removal.....                                        | 6  |
| <b>Table S3:</b> combined reported catalytic performance of catalysts for the conversion of synthesis gas to DME via a dual reactor process by combining methanol synthesis and methanol dehydration. .... | 7  |
| <b>Table S4:</b> reported catalytic performance of bifunctional catalysts for the direct conversion of synthesis gas to C <sub>2</sub> -C <sub>4</sub> olefins via the OX-ZEO process.....                 | 9  |
| <b>Table S5:</b> reported catalytic performance of FTO catalysts for the direct conversion of synthesis gas to C <sub>2</sub> -C <sub>4</sub> olefins.....                                                 | 13 |
| <b>Table S6:</b> combined reported catalytic performance of catalysts for the conversion of synthesis gas to C <sub>2</sub> -C <sub>4</sub> olefins via a dual reactor process.....                        | 15 |
| <b>Table S7:</b> reported catalytic performance of bifunctional catalysts for the direct conversion of synthesis gas to aromatics via the OX-ZEO process.....                                              | 17 |
| <b>Table S8:</b> reported catalytic performance of bifunctional catalysts for the direct conversion of synthesis gas to aromatics by combining FTO catalysts and zeolites.....                             | 19 |
| <b>Table S9:</b> combined reported catalytic performance of catalysts for the conversion of synthesis gas to aromatics via a dual reactor process.....                                                     | 22 |
| <b>Table S10:</b> average blending research octane numbers of C <sub>5</sub> -C <sub>11</sub> paraffins divided into number of branches. ....                                                              | 24 |
| <b>Table S11:</b> average blending research octane numbers of C <sub>5</sub> -C <sub>11</sub> olefins divided into number of branches.....                                                                 | 25 |
| <b>Table S12:</b> average blending research octane numbers of C <sub>6</sub> -C <sub>11</sub> aromatics divided into number of side chains.....                                                            | 26 |
| <b>Table S13:</b> thermodynamic distribution of C <sub>5</sub> -C <sub>11</sub> n- and iso-paraffins between 200°C and 300°C. Calculated with Outotec HSC 4 at 20 bar pressure. ....                       | 28 |
| <b>Table S14:</b> reported catalytic performance of bifunctional catalysts for the direct conversion of synthesis gas to gasoline by combining Co-based FT catalysts and 12-membered ring zeolites.....    | 29 |
| <b>Table S15:</b> reported catalytic performance of bifunctional catalysts for the direct conversion of synthesis gas to gasoline by combining Co-based FT catalysts and 10-membered ring zeolites.....    | 31 |
| <b>Table S16:</b> reported catalytic performance of bifunctional catalysts for the direct conversion of synthesis gas to gasoline by combining Co-based FT catalysts and non-micro porous solid acids..... | 33 |
| <b>Table S17:</b> reported catalytic performance of bifunctional catalysts for the direct conversion of synthesis gas to gasoline by combining Fe-based FT catalysts and zeolites.....                     | 34 |
| <b>Table S18:</b> reported catalytic performance of bifunctional OX-ZEO catalysts for the direct conversion of synthesis gas to gasoline. ....                                                             | 35 |
| <b>Table S19:</b> reported catalytic performance of bifunctional catalysts for the direct conversion of synthesis gas to gasoline operated in dual bed mode with dedicated temperatures.....               | 36 |
| <b>Table S20:</b> combined reported catalytic performance of catalysts for the conversion of synthesis gas to gasoline combining methanol synthesis and MTG in individual processes.....                   | 37 |

## List of Figures

|                                                                                                                                                   |    |
|---------------------------------------------------------------------------------------------------------------------------------------------------|----|
| <b>Figure S1:</b> average blending research octane number of C <sub>5</sub> -C <sub>11</sub> paraffins as function of number of branching... ..   | 24 |
| <b>Figure S2:</b> average blending research octane number of C <sub>5</sub> -C <sub>11</sub> olefins as function of number of branching. ....     | 25 |
| <b>Figure S3:</b> blending research octane number of linear C <sub>5</sub> -C <sub>10</sub> olefins as function of double bond position. ....     | 25 |
| <b>Figure S4:</b> average blending research octane number of C <sub>6</sub> -C <sub>11</sub> aromatics as function of number of side chains. .... | 26 |
| <b>Figure S5:</b> average blending research octane number of aromatics as function of carbon number. ....                                         | 26 |

## 1. DME

To determine the overall carbon atom based selectivity of different processes to convert synthesis gas to DME, we calculated the yield of DME (Equation 1, Equation 2, Equation 3) from published data and plotted this against the corresponding CO conversion (Equation 4). The resulting slope gives the selectivity to DME and can be averaged over a set of data (Equation 5).

$$Y(DME) = \frac{\dot{n}_{out}(DME)}{\dot{n}_{in}(CO_x)} * f(DME) \quad \text{Equation 1}$$

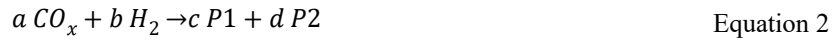

$$f(P1) = \frac{a}{c} \quad \text{Equation 3}$$

$$X(CO_x) = \frac{\dot{n}_{in}(CO_x) - \dot{n}_{out}(CO_x)}{\dot{n}_{in}(CO_x)} \quad \text{Equation 4}$$

$$S(DME) = \frac{Y(DME)}{X(CO_x)} \quad \text{Equation 5}$$

Where,

$Y$ : yield [-]

$\dot{n}_{out}$ : molar carbon flow at reactor outlet [mol<sub>C</sub>/s]

$\dot{n}_{in}$ : molar carbon flow at reactor inlet [mol<sub>C</sub>/s]

$f$ : ratio of stoichiometric coefficients from the reaction equation

$P1, P2$ : reaction products

$S$ : selectivity [-]

$X$ : conversion [-]

We distinguished between bifunctional catalysts, bifunctional catalysts with *in-situ* water removal and a dual reactor process. For the bifunctional catalysts a methanol synthesis function is combined with a methanol dehydration function. Bifunctional catalysts with *in-situ* water removal additionally comprise a molecular sieve material that allows to remove water being formed during the reaction by adsorption. This can push the equilibrium of the reactants further to the side of DME and boost activity. The dual reactor approach shows the combination of methanol synthesis with consecutive methanol dehydration in separate processes. We used reported catalytic data of methanol synthesis catalysts and combined these with reported data of methanol dehydration catalysts. The calculation of the DME yields can be found in Table S1 (bifunctional catalysts), Table S2 (bifunctional catalysts with *in-situ* water removal) and Table S3 (dual reactor process).

**Table S1:** reported catalytic performance of bifunctional catalysts for the direct conversion of synthesis gas to DME

| catalyst                                    | MeOH cat            | Solid acid                                                     | Temperature | Pressure | CO conversion | CO <sub>2</sub> selectivity | DME selectivity | MeOH selectivity | Hydrocarbon selectivity | DME yield      | ref |
|---------------------------------------------|---------------------|----------------------------------------------------------------|-------------|----------|---------------|-----------------------------|-----------------|------------------|-------------------------|----------------|-----|
|                                             |                     |                                                                | °C          | bar(g)   | %             | % <sub>c</sub>              | % <sub>c</sub>  | % <sub>c</sub>   | % <sub>c</sub>          | % <sub>c</sub> |     |
| Zn@m-Al <sub>2</sub> O <sub>3</sub>         | CuZnAl              | γ-Al <sub>2</sub> O <sub>3</sub>                               | 250         | 30       | 0.8           | 0.0                         | 65.3            | 21.1             | 13.6                    | 0.5            | 1   |
| Cr/ZnO-SAPO46-M                             | CrZn                | SAPO46                                                         | 350         | 50       | 4.7           | 2.9                         | 16.0            | 69.6             | 11.5                    | 0.8            | 2   |
| 15.9%Nb/Al + CCMS                           | CuZnAl              | Nb <sub>2</sub> O <sub>5</sub> -Al <sub>2</sub> O <sub>3</sub> | 265         | 50       | 6             | 27.2                        | 66.0            | 6.1              | 0.7                     | 4.0            | 3   |
| Cr/ZnO-SAPO46-PhyC                          | CrZn                | SAPO46                                                         | 350         | 50       | 6.9           | 6.0                         | 34.8            | 49.1             | 10.2                    | 2.4            | 2   |
| CZA-4                                       | CuZn                | γ-Al <sub>2</sub> O <sub>3</sub>                               | 250         | 50       | 7.1           | 29.9                        | 67.0            | 1.1              | 2.0                     | 4.8            | 4   |
| 5.9%Nb/Al + CCMS                            | CuZnAl              | Nb <sub>2</sub> O <sub>5</sub> -Al <sub>2</sub> O <sub>3</sub> | 265         | 50       | 8             | 27.7                        | 64.9            | 6.8              | 0.6                     | 5.2            | 3   |
| Pd/silica-SZ                                | Pd-SiO <sub>2</sub> | HZSM-5                                                         | 250         | 50       | 9             | 1.7                         | 69.0            | 4.8              | 26.5                    | 6.2            | 5   |
| CZA-Z-IP                                    | CuZnAl              | γ-Al <sub>2</sub> O <sub>3</sub>                               | 250         | 50       | 10            | 29.0                        | 61.0            | 9.0              | 1.0                     | 6.1            | 6   |
| Pd/Ga(1:2)/γ-Al <sub>2</sub> O <sub>3</sub> | Pd                  | γ-Al <sub>2</sub> O <sub>3</sub>                               | 250         | 50       | 10.9          | 33.6                        | 52.4            | 1.9              | 12.1                    | 5.7            | 7   |
| CZA-2                                       | CuZn                | γ-Al <sub>2</sub> O <sub>3</sub>                               | 250         | 50       | 11.1          | 30.7                        | 64.3            | 1.2              | 3.9                     | 7.1            | 4   |
| Cu@m-Al <sub>2</sub> O <sub>3</sub>         | CuZnAl              | γ-Al <sub>2</sub> O <sub>3</sub>                               | 250         | 30       | 13.2          | 25.7                        | 68.5            | 4.7              | 1.2                     | 9.0            | 1   |
| CZA-ZSM5                                    | CuZnAl              | HZSM-5                                                         | 250         | 40       | 13.9          | 20.9                        | 14.4            | 64.1             | 0.6                     | 2.0            | 8   |
| CZA-NaY                                     | CuZnAl              | NaY                                                            | 250         | 40       | 14.6          | 15.2                        | 12.5            | 71.7             | 0.6                     | 1.8            | 8   |
| Pd/Ga(1:2)/γ-Al <sub>2</sub> O <sub>3</sub> | Pd                  | γ-Al <sub>2</sub> O <sub>3</sub>                               | 260         | 50       | 14.6          | 35.1                        | 46.2            | 1.8              | 16.9                    | 6.7            | 7   |
| CuZn@m-Al <sub>2</sub> O <sub>3</sub>       | CuZnAl              | γ-Al <sub>2</sub> O <sub>3</sub>                               | 250         | 30       | 15.5          | 24.5                        | 70.3            | 4.3              | 0.9                     | 10.9           | 1   |
| CZA-Z-CF                                    | CuZnAl              | γ-Al <sub>2</sub> O <sub>3</sub>                               | 250         | 50       | 17            | 46.0                        | 38.0            | 9.0              | 7.0                     | 6.5            | 6   |
| CuZn/m-Al <sub>2</sub> O <sub>3</sub>       | CuZnAl              | γ-Al <sub>2</sub> O <sub>3</sub>                               | 250         | 30       | 17.4          | 15.9                        | 70.2            | 11.8             | 2.1                     | 12.2           | 1   |
| Pd/Ga(1:2)/γ-Al <sub>2</sub> O <sub>3</sub> | Pd                  | γ-Al <sub>2</sub> O <sub>3</sub>                               | 270         | 50       | 19.6          | 37.6                        | 38.2            | 1.7              | 22.2                    | 7.5            | 7   |
| CZA-5                                       | CuZn                | γ-Al <sub>2</sub> O <sub>3</sub>                               | 250         | 50       | 19.9          | 30.2                        | 68.3            | 0.9              | 0.7                     | 13.6           | 4   |
| CZA-MA                                      | CuZnAl              | γ-Al <sub>2</sub> O <sub>3</sub>                               | 275         | 50       | 22            | 30.3                        | 52.5            | 17               | 0.2                     | 11.5           | 9   |
| CZA-Y                                       | CuZnAl              | Y                                                              | 250         | 40       | 22.7          | 57.2                        | 29.7            | 12.5             | 0.6                     | 6.7            | 8   |
| CZA-Y                                       | CuZnAl              | Y                                                              | 250         | 40       | 22.9          | 59.8                        | 26.8            | 12.8             | 0.6                     | 6.1            | 10  |
| CZA-ZSM5                                    | CuZnAl              | HZSM-5                                                         | 250         | 40       | 23.3          | 26.2                        | 27.9            | 45.0             | 0.9                     | 6.5            | 10  |
| CZA-1                                       | CuZn                | γ-Al <sub>2</sub> O <sub>3</sub>                               | 250         | 50       | 24.4          | 31.8                        | 58.7            | 6.2              | 3.4                     | 14.3           | 4   |
| CZA@HZSM-5-SS                               | CuZnAl              | HZSM-5                                                         | 250         | 30       | 26.3          | 14.3                        | 28.7            | 56.3             | 0.6                     | 7.5            | 11  |
| FCZZ25(N)-10Z                               | CuZnZr              | HZSM-5                                                         | 250         | 45       | 29.4          | 31.5                        | 60.1            | 8.3              | 0.1                     | 17.7           | 12  |
| CZA/ZrFER(5)                                | CuZnAl              | FER                                                            | 250         | 40       | 29.8          | 31.6                        | 34.0            | 34.0             | 0.4                     | 10.1           | 13  |
| CZA-FER                                     | CuZnAl              | FER                                                            | 250         | 40       | 30.2          | 27.8                        | 28.7            | 42.8             | 0.7                     | 8.7            | 8   |
| CZA/ZrFER(0)                                | CuZnAl              | FER                                                            | 250         | 40       | 30.4          | 27.9                        | 28.7            | 42.8             | 0.6                     | 8.7            | 13  |
| CZA-Z-CS                                    | CuZnAl              | γ-Al <sub>2</sub> O <sub>3</sub>                               | 250         | 50       | 35            | 32.0                        | 66.0            | 2.0              | 1.0                     | 23.1           | 6   |
| CZA/ZrFER(1)                                | CuZnAl              | FER                                                            | 250         | 40       | 35.3          | 36.7                        | 40.8            | 22.1             | 0.4                     | 14.4           | 13  |
| T-4611+H-MOR 90                             | CuZnAl              | H-MOR 90                                                       | 250         | 50       | 37            | 43.9                        | 25.2            | 1.3              | 29.6                    | 9.3            | 14  |
| CZAZr/HFER                                  | CuZnAl              | FER                                                            | 250         | 50       | 38            | 33.0                        | 65.0            | 2.0              | 0.0                     | 24.7           | 15  |
| 0-CLZ-A                                     | CuZrLa              | γ-Al <sub>2</sub> O <sub>3</sub>                               | 260         | 40       | 38.7          | 42.4                        | 54.6            | 2.8              | 0.2                     | 21.1           | 16  |
| 13 wt-% Cu + HZSM-5 (140)                   | CuZn                | HZSM-5                                                         | 280         | 50       | 40            | -                           | -               | 2.6              | -                       | 25.0           | 17  |
| CZA/ZrFER(K)                                | CuZnAl              | FER                                                            | 250         | 40       | 40.8          | 33.4                        | 37.5            | 27.7             | 1.4                     | 15.3           | 13  |

**Table S1:** reported catalytic performance of bifunctional catalysts for the direct conversion of synthesis gas to DME (continued)

| catalyst                                                 | MeOH cat | Solid acid                                                                             | Temperature | Pressure | CO conversion | CO <sub>2</sub> selectivity | DME selectivity | MeOH selectivity | Hydrocarbon selectivity | DME yield      | ref |
|----------------------------------------------------------|----------|----------------------------------------------------------------------------------------|-------------|----------|---------------|-----------------------------|-----------------|------------------|-------------------------|----------------|-----|
|                                                          |          |                                                                                        | °C          | bar(g)   | %             | % <sub>c</sub>              | % <sub>c</sub>  | % <sub>c</sub>   | % <sub>c</sub>          | % <sub>c</sub> |     |
| CZA/Al(10)-FER                                           | CuZnAl   | FER                                                                                    | 250         | 35       | 43            | 22.2                        | 74.1            | 2.8              | 1.0                     | 31.9           | 18  |
| g-Al <sub>2</sub> O <sub>3</sub>                         | CuZnAl   | γ-Al <sub>2</sub> O <sub>3</sub>                                                       | 260         | 40       | 44            | 25.0                        | 70.5            | 3.8              | 0.8                     | 31.0           | 19  |
| CZA-Z-OX                                                 | CuZnAl   | γ-Al <sub>2</sub> O <sub>3</sub>                                                       | 250         | 50       | 45            | 32.0                        | 66.0            | 1.0              | 1.0                     | 29.7           | 6   |
| CuZnAl/SAPO11-M                                          | CuZnAl   | SAPO11                                                                                 | 250         | 50       | 46.2          | 6.1                         | 43.8            | 48.3             | 1.9                     | 20.2           | 20  |
| CZA/Al(0)-FER                                            | CuZnAl   | FER                                                                                    | 250         | 35       | 46.6          | 24.1                        | 70.9            | 2.9              | 2.1                     | 33.0           | 18  |
| C/Z-PC                                                   | CuZnAl   | HZSM-5                                                                                 | 250         | 30       | 47.6          | 31.1                        | 66.3            | 3.4              | 0.2                     | 31.6           | 21  |
| CZA-Z                                                    | CuZnAl   | γ-Al <sub>2</sub> O <sub>3</sub>                                                       | 250         | 50       | 48            | 30.0                        | 69.0            | 1.0              | 0.0                     | 33.1           | 6   |
| 6-CLZ-A                                                  | CuZrLa   | γ-Al <sub>2</sub> O <sub>3</sub>                                                       | 260         | 40       | 48.2          | 33.5                        | 63.7            | 2.6              | 0.2                     | 30.7           | 16  |
| CZA-FER                                                  | CuZnAl   | FER                                                                                    | 250         | 40       | 49            | 33.7                        | 58.2            | 7.8              | 0.3                     | 28.5           | 10  |
| CZA/ZrFER(3)                                             | CuZnAl   | FER                                                                                    | 250         | 40       | 49            | 33.7                        | 58.2            | 7.8              | 0.3                     | 28.5           | 13  |
| 25STA@CZA-MA                                             | CuZnAl   | γ-Al <sub>2</sub> O <sub>3</sub> + H <sub>4</sub> [SiW <sub>12</sub> O <sub>40</sub> ] | 275         | 50       | 49            | 31.6                        | 59.8            | 8                | 0.4                     | 29.3           | 9   |
| NbOPO <sub>4</sub>                                       | CuZnAl   | NbOPO <sub>4</sub>                                                                     | 260         | 40       | 53            | 25.0                        | 72.0            | 2.3              | 0.8                     | 38.2           | 19  |
| C/Z-P                                                    | CuZnAl   | HZSM-5                                                                                 | 250         | 30       | 54.5          | 31.3                        | 65.3            | 2.3              | 1.1                     | 35.6           | 21  |
| 18-CLZ-A                                                 | CuZrLa   | γ-Al <sub>2</sub> O <sub>3</sub>                                                       | 260         | 40       | 54.6          | 30.7                        | 67.3            | 2.0              | 0.0                     | 36.7           | 16  |
| 12-CLZ-A                                                 | CuZrLa   | γ-Al <sub>2</sub> O <sub>3</sub>                                                       | 260         | 40       | 56.7          | 29.3                        | 69.0            | 1.7              | 0.0                     | 39.1           | 16  |
| C/Z-G                                                    | CuZnAl   | HZSM-5                                                                                 | 250         | 30       | 57.4          | 31.4                        | 64              | 2.1              | 2.5                     | 36.7           | 21  |
| FCZZ25(N)-10Z                                            | CuZnZr   | HZSM-5                                                                                 | 275         | 45       | 57.7          | 32.0                        | 62.7            | 5.0              | 0.3                     | 36.2           | 12  |
| CuZnAl/SAPO11-PhyC                                       | CuZnAl   | SAPO11                                                                                 | 250         | 50       | 58.5          | 9.1                         | 82.1            | 8.4              | 0.5                     | 48.0           | 20  |
| CZA/ZrFER(NH <sub>3</sub> )                              | CuZnAl   | FER                                                                                    | 250         | 40       | 59.4          | 34.7                        | 62.9            | 1.9              | 0.5                     | 37.4           | 13  |
| T-4611+γ-Al <sub>2</sub> O <sub>3</sub>                  | CuZnAl   | γ-Al <sub>2</sub> O <sub>3</sub>                                                       | 250         | 50       | 61            | 31.8                        | 67.0            | 1.1              | 0.2                     | 40.9           | 14  |
| CZA/Al(2.5)-FER                                          | CuZnAl   | FER                                                                                    | 250         | 35       | 61.8          | 25.6                        | 71.4            | 2.5              | 0.5                     | 44.1           | 18  |
| Nb <sub>2</sub> O <sub>5</sub> -nH <sub>2</sub> O        | CuZnAl   | Nb <sub>2</sub> O <sub>5</sub> -nH <sub>2</sub> O                                      | 260         | 40       | 62            | 25.0                        | 66.8            | 6.0              | 2.3                     | 41.4           | 19  |
| CZA/Al(5)-FER                                            | CuZnAl   | FER                                                                                    | 250         | 35       | 62.1          | 26.8                        | 69.4            | 3.0              | 0.7                     | 43.1           | 18  |
| CZA(A)                                                   | CuZnAl   | γ-Al <sub>2</sub> O <sub>3</sub>                                                       | 250         | 50       | 65.8          | 17.0                        | 55.6            | 26.9             | 0.5                     | 36.6           | 22  |
| T-4611+H-MFI 90                                          | CuZnAl   | H-MFI 90                                                                               | 250         | 50       | 66            | 49.0                        | 32.7            | 3.1              | 15.2                    | 21.6           | 14  |
| T-4611+H-MFI 400                                         | CuZnAl   | H-MFI 400                                                                              | 250         | 50       | 68            | 31.5                        | 66.8            | 1.5              | 0.2                     | 45.4           | 14  |
| FCZZ25(N)-10Z                                            | CuZnZr   | HZSM-5                                                                                 | 300         | 45       | 68            | 30.6                        | 63.8            | 5.1              | 0.5                     | 43.4           | 12  |
| g-Al <sub>2</sub> O <sub>3</sub>                         | CuZnAl   | γ-Al <sub>2</sub> O <sub>3</sub>                                                       | 280         | 40       | 69            | 27.0                        | 70.5            | 3.0              | 1.5                     | 48.6           | 19  |
| NbOPO <sub>4</sub>                                       | CuZnAl   | NbOPO <sub>4</sub>                                                                     | 280         | 40       | 73            | 27.0                        | 70.5            | 2.3              | 1.5                     | 51.5           | 19  |
| Nb <sub>2</sub> O <sub>5</sub> -nH <sub>2</sub> O        | CuZnAl   | Nb <sub>2</sub> O <sub>5</sub> -nH <sub>2</sub> O                                      | 280         | 40       | 75            | 27.0                        | 69.0            | 2.3              | 3.8                     | 51.8           | 19  |
| CZA@HZSM-5-EtOH                                          | CuZnAl   | HZSM-5                                                                                 | 250         | 30       | 76.5          | 26.7                        | 70.8            | 2.5              | 0.1                     | 54.2           | 11  |
| CuO-ZnO-Al <sub>2</sub> O <sub>3</sub> /MgZ <sub>1</sub> | CuZnAl   | HZSM-5                                                                                 | 260         | 40       | 96.3          | 30.5                        | 64.5            | 4.6              | 0.4                     | 62.1           | 23  |



**Table S2:** reported catalytic performance of bifunctional catalysts for the direct conversion of synthesis gas to DME using *in-situ* water removal

| catalyst                                             | MeOH cat | Solid acid                       | Temperature | Pressure | CO conversion     | CO2 selectivity | DME selectivity | MeOH selectivity | Hydrocarbon selectivity | DME yield | ref   |
|------------------------------------------------------|----------|----------------------------------|-------------|----------|-------------------|-----------------|-----------------|------------------|-------------------------|-----------|-------|
|                                                      |          |                                  | °C          | bar(g)   | %                 | % <sub>c</sub>  | % <sub>c</sub>  | % <sub>c</sub>   | % <sub>c</sub>          |           |       |
| CZA_comm                                             | CuZnAl   | γ-Al <sub>2</sub> O <sub>3</sub> | 275         | 25       | 55                | 4.0             | 95.0            | -                | -                       | 52.3      | 24    |
| mech mixture 1/1, 3mm                                |          | modelling                        |             |          | 68.1 <sup>1</sup> |                 | 97.8            |                  |                         | 66.6      | 25    |
| Cu/ZnO/Al <sub>2</sub> O <sub>3</sub> + zeolite (3Å) | CuZnAl   | γ-Al <sub>2</sub> O <sub>3</sub> | 275         | 25       | 70                | -               | 92.9            | -                | -                       | 65.0      | 26    |
| MeOH@DME 1/1, 3mm                                    |          | modelling                        |             |          | 72.6 <sup>1</sup> |                 | 97.5            |                  |                         | 70.8      | 25    |
| MeOH@DME 2/1, 3mm                                    |          | modelling                        |             |          | 76.8 <sup>1</sup> |                 | 97.9            |                  |                         | 75.2      | 25    |
| DME@MeOH 1/1, 3mm                                    |          | modelling                        |             |          | 77.5 <sup>1</sup> |                 | 97.2            |                  |                         | 75.3      | 25    |
| hybrid 1/1, 3mm                                      |          | modelling                        |             |          | 78.4 <sup>1</sup> |                 | 97.4            |                  |                         | 76.4      | 25    |
| mech mixture 1/1, 1.5mm                              |          | modelling                        |             |          | 78.6 <sup>1</sup> |                 | 97.7            |                  |                         | 76.8      | 25    |
| mech mixture 1/1, 1mm                                |          | modelling                        |             |          | 81.4 <sup>1</sup> |                 | 97.9            |                  |                         | 79.7      | 25    |
| Cu/ZnO/Al <sub>2</sub> O <sub>3</sub> + zeolite (3Å) | CuZnAl   | γ-Al <sub>2</sub> O <sub>3</sub> | 250         | 24       | 90.1 <sup>1</sup> |                 | 99.2            |                  |                         | 89.4      | 27,28 |
| Cu/ZnO/Al <sub>2</sub> O <sub>3</sub> + LTA (3Å)     | CuZnAl   | γ-Al <sub>2</sub> O <sub>3</sub> | 252         | 25       | 94.5 <sup>1</sup> |                 | 99.0            |                  |                         | 93.6      | 29    |

<sup>1</sup> CO<sub>x</sub> conversion, experiments were conducted with mixture of CO, CO<sub>2</sub> and H<sub>2</sub>

**Table S3:** combined reported catalytic performance of catalysts for the conversion of synthesis gas to DME via a dual reactor process by combining methanol synthesis and methanol dehydration.

|                                       | CO conversion<br>% | CO <sub>2</sub> selectivity<br>% <sub>c</sub> | methanol selectivity<br>% <sub>c</sub> | DME selectivity from methanol<br>% <sub>c</sub> | DME selectivity from synthesis gas<br>% <sub>c</sub> | yield<br>% <sub>c</sub> | ref |
|---------------------------------------|--------------------|-----------------------------------------------|----------------------------------------|-------------------------------------------------|------------------------------------------------------|-------------------------|-----|
| <b>dual reactor process</b>           |                    |                                               |                                        |                                                 |                                                      |                         |     |
| <b>MeOH</b>                           |                    |                                               |                                        |                                                 |                                                      |                         |     |
| Cu/ZnO/Al <sub>2</sub> O <sub>3</sub> | 8.6                |                                               | 97.7                                   |                                                 |                                                      | 8.4                     | 30  |
| 2Cu_MCF 10.7                          | 10.7               |                                               | 97                                     |                                                 |                                                      | 10.4                    | 31  |
| Cu/ZnO/Al <sub>2</sub> O <sub>3</sub> | 29.9               |                                               | 99.6                                   |                                                 |                                                      | 29.8                    | 30  |
| Cu/ZnO/Al <sub>2</sub> O <sub>3</sub> | 34.4               |                                               | 99.8                                   |                                                 |                                                      | 34.3                    | 30  |
| Cu/ZnO/Al <sub>2</sub> O <sub>3</sub> | 40.3               |                                               | 98.7                                   |                                                 |                                                      | 39.8                    | 30  |
| Cu/ZnO/Al <sub>2</sub> O <sub>3</sub> | 47.0               |                                               | 98.9                                   |                                                 |                                                      | 46.5                    | 30  |
| <b>MeOH + DME</b>                     |                    |                                               |                                        |                                                 |                                                      |                         |     |
| Al-HMS-10                             | 8.6                | 0                                             |                                        | 100 (at 89% methanol conversion)                | 87.0                                                 | 7.5                     | 32  |
| Al-HMS-10                             | 10.7               | 0                                             |                                        | 100 (at 89% methanol conversion)                | 86.3                                                 | 9.2                     | 32  |
| Al-HMS-10                             | 29.9               | 0                                             |                                        | 100 (at 89% methanol conversion)                | 88.6                                                 | 26.5                    | 32  |
| Al-HMS-10                             | 34.4               | 0                                             |                                        | 100 (at 89% methanol conversion)                | 88.8                                                 | 30.6                    | 32  |
| Al-HMS-10                             | 40.3               | 0                                             |                                        | 100 (at 89% methanol conversion)                | 87.8                                                 | 35.4                    | 32  |
| Al-HMS-10                             | 47.0               | 0                                             |                                        | 100 (at 89% methanol conversion)                | 88.0                                                 | 41.4                    | 32  |



## 2. Olefins

The overall selectivity of the conversion of synthesis gas to C<sub>2</sub>-C<sub>4</sub> olefins was analyzed by calculation of the yield to C<sub>2</sub>-C<sub>4</sub> olefins (Equation 6) and dividing by the conversion to obtain the selectivity (Equation 7). The olefins analyzed own different carbon atom numbers, hence the yield was directly calculated using the amount of carbon atoms within the C<sub>2</sub>-C<sub>4</sub> olefins formed ( $\dot{n}_{out}(C_{olefins})$  in Equation 6).

Three different approaches were analyzed to convert synthesis gas into olefins, namely OX-ZEO, Fischer-Tropsch to olefins (FTO) and a dual reactor process. The OX-ZEO and FTO process both include recent studies with decreased water-gas-shift activity and are labeled with *low CO<sub>2</sub>*. The dual reactor approach shows the combination of methanol synthesis with consecutive methanol-to-olefins (MTO) reaction in separate processes. We used reported catalytic data of methanol synthesis catalysts and combined these with reported data of MTO catalysts. The calculation of the C<sub>2</sub>-C<sub>4</sub> olefin yields can be found in Table S4 (OX-ZEO), Table S5 (FTO) and Table S6 (dual reactor process).

$$Y(olefins) = \frac{\dot{n}_{out}(C_{olefins})}{\dot{n}_{in}(CO_x)} \quad \text{Equation 6}$$

$$S(olefins) = \frac{Y(olefins)}{X(CO_x)} \quad \text{Equation 7}$$

Where,

*Y*:yield

$\dot{n}_{out}$ :molar flow at reactor outlet

$\dot{n}_{in}$ :molar flow at reactor inlet

$C_{olefins}$ :carbon atoms in olefin molecules

*S*:selectivity

*X*:conversion

**Table S4:** reported catalytic performance of bifunctional catalysts for the direct conversion of synthesis gas to C<sub>2</sub>-C<sub>4</sub> olefins via the OX-ZEO process

| catalyst                                  | CO conversion | CO <sub>2</sub> selectivity | C <sub>2</sub> -C <sub>4</sub> olefins in hydrocarbons | hydrocarbons selectivity | C <sub>2</sub> -C <sub>4</sub> olefin selectivity | C <sub>2</sub> -C <sub>4</sub> olefin yield | ref |
|-------------------------------------------|---------------|-----------------------------|--------------------------------------------------------|--------------------------|---------------------------------------------------|---------------------------------------------|-----|
|                                           | %             | % <sub>C</sub>              | % <sub>C</sub>                                         | % <sub>C</sub>           | % <sub>C</sub>                                    | % <sub>C</sub>                              |     |
| <b>OX-ZEO</b>                             |               |                             |                                                        |                          |                                                   |                                             |     |
| ZrO <sub>2</sub>                          | 4             | 42.0                        | 79.0                                                   | 58.0                     | 45.8                                              | 1.8                                         | 33  |
| ZnCr/SAPO-17, 1 Mpa                       | 4.3           | 47.9                        | 75.6                                                   | 52.1                     | 39.4                                              | 1.7                                         | 34  |
| Mn/Ga <sub>2</sub> O <sub>3</sub>         | 5.3           | 44.8                        | 61.5                                                   | 55.2                     | 33.9                                              | 1.8                                         | 35  |
| ZnO                                       | 6             | 42.0                        | 26.5                                                   | 58.0                     | 15.4                                              | 0.9                                         | 33  |
| ZnCrOx/MSAPO                              | 6             | 45.0                        | 68.0                                                   | 55.0                     | 37.4                                              | 2.2                                         | 36  |
| MnxZry/SAPO34 Mn:Zr = 1 : 0               | 6.9           | 24.3                        | 68.5                                                   | 75.7                     | 51.9                                              | 3.6                                         | 37  |
| ZnAlOx/CHA Si/Al=307                      | 8             | 40.0                        | 86.0                                                   | 60.0                     | 51.6                                              | 4.1                                         | 38  |
| MnxZry/SAPO34 Mn:Zr = 1 : 0,25            | 8.5           | 48.4                        | 49.3                                                   | 51.6                     | 25.4                                              | 2.2                                         | 37  |
| MG-(SM)                                   | 8.6           | 44.5                        | 68.3                                                   | 55.5                     | 37.9                                              | 3.3                                         | 35  |
| MnxZry/SAPO34 Mn:Zr = 1 : 0,5             | 8.8           | 46.0                        | 50.2                                                   | 54.0                     | 27.1                                              | 2.4                                         | 37  |
| ZnAlOx/CHA Si/Al=237                      | 9             | 40.0                        | 85.0                                                   | 60.0                     | 51.0                                              | 4.6                                         | 38  |
| MnxZry/SAPO34 Mn:Zr = 1 : 4               | 9.3           | 47.2                        | 52.2                                                   | 52.8                     | 27.6                                              | 2.6                                         | 37  |
| ZnAlOx/CHA Si/Al=138                      | 9.5           | 40.0                        | 80.0                                                   | 60.0                     | 48.0                                              | 4.6                                         | 38  |
| MnxZry/SAPO34 Mn:Zr = 1 : 1               | 9.7           | 43.9                        | 43.5                                                   | 56.1                     | 24.4                                              | 2.4                                         | 37  |
| ZnAlOx/CHA Si/Al=76                       | 10            | 45.0                        | 75.0                                                   | 55.0                     | 41.3                                              | 4.1                                         | 38  |
| GaCeOx                                    | 10            | 42                          | 79                                                     | 58.0                     | 45.8                                              | 4.6                                         | 39  |
| MnxZry/SAPO34 Mn:Zr = 1 : 2               | 10.6          | 45.3                        | 59.6                                                   | 54.7                     | 32.6                                              | 3.5                                         | 37  |
| ZnCrOx/MSAPO                              | 12            | 45.0                        | 72.0                                                   | 55.0                     | 39.6                                              | 4.8                                         | 36  |
| ZnAlOx/CHA Si/Al=20                       | 12            | 47.0                        | 56.0                                                   | 53.0                     | 29.7                                              | 3.6                                         | 38  |
| ZnAlOx/CHA Si/Al=38                       | 12            | 46.0                        | 67.0                                                   | 54.0                     | 36.2                                              | 4.3                                         | 38  |
| ZnCr/SAPO-17, 2 Mpa                       | 12.6          | 47.9                        | 87.3                                                   | 52.1                     | 45.5                                              | 5.7                                         | 34  |
| ZnCrOx + H-SSZ-13 (27C)                   | 12.6          | 51.3                        | 60.9                                                   | 48.7                     | 29.7                                              | 3.7                                         | 40  |
| InZr/SAPO34                               | 13.1          | 40.0                        | 79.9                                                   | 60.0                     | 47.9                                              | 6.3                                         | 41  |
| ZnCrOx + SAPO-35(0.17)                    | 13.9          | 46.9                        | 74.2                                                   | 53.1                     | 39.4                                              | 5.5                                         | 42  |
| ZnAl <sub>2</sub> O <sub>4</sub> /SAPO-35 | 15            | 44.0                        | 56.0                                                   | 56.0                     | 31.4                                              | 4.7                                         | 43  |
| SP17(48h)                                 | 15.6          | 47.8                        | 88.7                                                   | 52.2                     | 46.3                                              | 7.2                                         | 44  |
| ZnCrOx + H-SSZ-13 (23C)                   | 16            | 50.2                        | 66.1                                                   | 49.8                     | 32.9                                              | 5.3                                         | 40  |
| InZr/SAPO34                               | 16.2          | 40.0                        | 73.7                                                   | 60.0                     | 44.2                                              | 7.2                                         | 41  |
| ZnCr/SAPO-17, 370°C                       | 16.4          | 42.5                        | 91.4                                                   | 57.5                     | 52.6                                              | 8.6                                         | 34  |
| ZnCrOx + SAPO-35(0.11)                    | 16.5          | 47.4                        | 75.1                                                   | 52.6                     | 39.5                                              | 6.5                                         | 42  |
| Zn-ZrO <sub>2</sub> (1:64)/H-SSZ-13-45H   | 17            | 42.0                        | 76.7                                                   | 58.0                     | 44.5                                              | 7.6                                         | 33  |
| ZnCrOx/MSAPO                              | 17            | 45.0                        | 73.0                                                   | 55.0                     | 40.2                                              | 6.8                                         | 36  |
| ZnO-ZrO <sub>2</sub> /SAPO-34 0,12mmol/g  | 17            | 43.0                        | 76.0                                                   | 57.0                     | 43.3                                              | 7.4                                         | 45  |
| ZnCrOx + SAPO-18(0.030)                   | 17.2          | 49.9                        | 75.1                                                   | 50.1                     | 37.6                                              | 6.5                                         | 42  |
| SP17(72h)                                 | 17.2          | 46.7                        | 86.2                                                   | 53.3                     | 45.9                                              | 7.9                                         | 44  |

**Table S4:** reported catalytic performance of bifunctional catalysts for the direct conversion of synthesis gas to C<sub>2</sub>-C<sub>4</sub> olefins via the OX-ZEO process (continued)

| catalyst                                  | CO conversion | CO <sub>2</sub> selectivity | C <sub>2</sub> -C <sub>4</sub> olefins in hydrocarbons |                | hydrocarbons selectivity | C <sub>2</sub> -C <sub>4</sub> olefin selectivity | C <sub>2</sub> -C <sub>4</sub> olefin yield | ref |
|-------------------------------------------|---------------|-----------------------------|--------------------------------------------------------|----------------|--------------------------|---------------------------------------------------|---------------------------------------------|-----|
|                                           | %             | % <sub>c</sub>              | % <sub>c</sub>                                         | % <sub>c</sub> | % <sub>c</sub>           | % <sub>c</sub>                                    | % <sub>c</sub>                              |     |
| ZnCrOx + H-SSZ-13 (19C)                   | 17.3          | 49.7                        |                                                        | 53.9           | 50.3                     | 27.1                                              | 4.7                                         | 40  |
| ZnCr/SAPO-17, 360°C                       | 17.4          | 38.4                        |                                                        | 91.5           | 61.6                     | 56.4                                              | 9.8                                         | 34  |
| ZnCr/SAPO-17, 380°C                       | 17.5          | 47.0                        |                                                        | 90.9           | 53.0                     | 48.2                                              | 8.4                                         | 34  |
| ZnCrOx + SAPO-18(0.054)                   | 18.2          | 49.4                        |                                                        | 69.9           | 50.6                     | 35.4                                              | 6.4                                         | 42  |
| ZnCr/Low Si AIPO-18                       | 19            |                             |                                                        |                |                          |                                                   | 8.4                                         | 46  |
| SP17(120h)                                | 19.3          | 48.5                        |                                                        | 81.8           | 51.5                     | 42.1                                              | 8.1                                         | 44  |
| SP17(96h)                                 | 19.4          | 46.4                        |                                                        | 87             | 53.6                     | 46.6                                              | 9.0                                         | 44  |
| ZnCrOx + H-SSZ-13 (19S)                   | 19.7          | 48.6                        |                                                        | 68.1           | 51.4                     | 35.0                                              | 6.9                                         | 40  |
| ZnCrOx + SAPO-18(0.048)                   | 19.9          | 49.2                        |                                                        | 68.6           | 50.8                     | 34.8                                              | 6.9                                         | 42  |
| ZnCrOx/MSAPO                              | 20            | 45.0                        |                                                        | 80.0           | 55.0                     | 44.0                                              | 8.8                                         | 36  |
| ZnO-ZrO <sub>2</sub> /SAPO-34 0,16mmol/g  | 20            | 40.0                        |                                                        | 77.0           | 60.0                     | 46.2                                              | 9.2                                         | 45  |
| ZnCrOx + H-SSZ-13 (26S)                   | 20            | 48.9                        |                                                        | 71.6           | 51.1                     | 36.6                                              | 7.3                                         | 40  |
| ZnCrOx + H-SSZ-13 (12S)                   | 20.7          | 49.0                        |                                                        | 55.1           | 51.0                     | 28.1                                              | 5.8                                         | 40  |
| ZnCrOx + H-SSZ-13 (23S)                   | 20.9          | 48.0                        |                                                        | 70.8           | 52.0                     | 36.8                                              | 7.7                                         | 40  |
| ZnAl <sub>2</sub> O <sub>4</sub> /SAPO-18 | 21            | 44.0                        |                                                        | 69.0           | 56.0                     | 38.6                                              | 8.1                                         | 43  |
| Zn-ZrO <sub>2</sub> (1:32)/H-SSZ-13-45H   | 22            | 42.0                        |                                                        | 74.4           | 58.0                     | 43.2                                              | 9.5                                         | 33  |
| Zn-ZrO <sub>2</sub> (4:1)/H-SSZ-13-45H    | 22            | 42.0                        |                                                        | 35.1           | 58.0                     | 20.4                                              | 4.5                                         | 33  |
| ZnCrOx/MSAPO                              | 22            | 45.0                        |                                                        | 71.0           | 55.0                     | 39.1                                              | 8.6                                         | 36  |
| ZnCr/SAPO-17, 390°C                       | 22            | 48.6                        |                                                        | 90.0           | 51.4                     | 46.3                                              | 10.2                                        | 34  |
| GaMnOx                                    | 22            | 42                          |                                                        | 89             | 58.0                     | 51.6                                              | 11.4                                        | 39  |
| ZnAl <sub>2</sub> O <sub>4</sub> /SAPO-17 | 23            | 42.0                        |                                                        | 65.0           | 58.0                     | 37.7                                              | 8.7                                         | 43  |
| Zn-ZrO <sub>2</sub> (1:16)/H-SSZ-13-45H   | 24            | 42.0                        |                                                        | 74.0           | 58.0                     | 42.9                                              | 10.3                                        | 33  |
| ZnO-ZrO <sub>2</sub> /SAPO-34 0,22mmol/g  | 24            | 41.0                        |                                                        | 81.0           | 59.0                     | 47.8                                              | 11.5                                        | 45  |
| ZnAl <sub>2</sub> O <sub>4</sub> /SAPO-34 | 24            | 44.0                        |                                                        | 80.0           | 56.0                     | 44.8                                              | 10.8                                        | 43  |
| ZnCr/Low Si AIPO-18                       | 25            |                             |                                                        |                |                          |                                                   | 11.3                                        | 46  |
| ZnCr/Low Si AIPO-18                       | 25            |                             |                                                        |                |                          |                                                   | 10.6                                        | 46  |
| ZnCrOx-MOR#2-py                           | 26            | 45.0                        |                                                        | 73.0           | 55.0                     | 40.2                                              | 10.4                                        | 47  |
| ZnCr/SAPO-17, 400°C                       | 26.2          | 48.6                        |                                                        | 88.3           | 51.4                     | 45.4                                              | 11.9                                        | 34  |
| ZnCr/SAPO-17, 3 Mpa                       | 26.2          | 48.6                        |                                                        | 88.3           | 51.4                     | 45.4                                              | 11.9                                        | 34  |
| Zn-ZrO <sub>2</sub> (1:4)/H-SSZ-13-45H    | 27            | 42.0                        |                                                        | 65.5           | 58.0                     | 38.0                                              | 10.3                                        | 33  |
| ZnO-ZrO <sub>2</sub> /SAPO-34 0,26mmol/g  | 27            | 41.0                        |                                                        | 75.0           | 59.0                     | 44.3                                              | 11.9                                        | 45  |
| InZr/SAPO34                               | 27.7          | 40.0                        |                                                        | 73.6           | 60.0                     | 44.2                                              | 12.2                                        | 41  |
| Zn-ZrO <sub>2</sub> (2:1)/H-SSZ-13-45H    | 28            | 42.0                        |                                                        | 54.2           | 58.0                     | 31.4                                              | 8.8                                         | 33  |
| ZnCrOx/MSAPO                              | 28            | 45.0                        |                                                        | 71.0           | 55.0                     | 39.1                                              | 10.9                                        | 36  |
| ZnCr/SAPO-17, 410°C                       | 28.5          | 48.4                        |                                                        | 85.3           | 51.6                     | 44.0                                              | 12.5                                        | 34  |
| SP34                                      | 28.5          | 45.2                        |                                                        | 87.1           | 54.8                     | 47.7                                              | 13.6                                        | 44  |

**Table S4:** reported catalytic performance of bifunctional catalysts for the direct conversion of synthesis gas to C<sub>2</sub>-C<sub>4</sub> olefins via the OX-ZEO process (continued)

| catalyst                                              | CO conversion | CO <sub>2</sub> selectivity | C <sub>2</sub> -C <sub>4</sub> olefins in hydrocarbons |                | hydrocarbons selectivity | C <sub>2</sub> -C <sub>4</sub> olefin selectivity | C <sub>2</sub> -C <sub>4</sub> olefin yield | ref |
|-------------------------------------------------------|---------------|-----------------------------|--------------------------------------------------------|----------------|--------------------------|---------------------------------------------------|---------------------------------------------|-----|
|                                                       | %             | % <sub>c</sub>              | % <sub>c</sub>                                         | % <sub>c</sub> | % <sub>c</sub>           | % <sub>c</sub>                                    | % <sub>c</sub>                              |     |
| SP18                                                  | 28.7          | 45                          |                                                        | 87             | 55.0                     | 47.9                                              | 13.7                                        | 44  |
| Zn-ZrO <sub>2</sub> (1:1)/H-SSZ-13-45H                | 29            | 42.0                        |                                                        | 61.8           | 58.0                     | 35.9                                              | 10.4                                        | 33  |
| ZnCrO <sub>x</sub> /MSAPO                             | 30            | 45.0                        |                                                        | 73.0           | 55.0                     | 40.2                                              | 12.0                                        | 36  |
| ZnCr/SAPO-34                                          | 30            |                             |                                                        |                |                          |                                                   | 12.6                                        | 46  |
| ZnO-ZrO <sub>2</sub> /SAPO-34 0,27mmol/g              | 30            | 41.0                        |                                                        | 70.0           | 59.0                     | 41.3                                              | 12.4                                        | 45  |
| InZr/SAPO34                                           | 30.7          | 40.0                        |                                                        | 67.3           | 60.0                     | 40.4                                              | 12.4                                        | 41  |
| ZnCr/Low Si AlPO-18                                   | 31            |                             |                                                        |                |                          |                                                   | 13.3                                        | 46  |
| ZA-CP                                                 | 33.9          | 43.5                        |                                                        | 75             | 56.5                     | 42.4                                              | 14.4                                        | 48  |
| ZnCr/Low Si AlPO-18                                   | 34            |                             |                                                        |                |                          |                                                   | 14.3                                        | 46  |
| ZnCr/Low Si AlPO-18                                   | 34            |                             |                                                        |                |                          |                                                   | 15.3                                        | 46  |
| ZnCrO <sub>x</sub> -SAPO-18 Si/Al = 0,011             | 35.5          | 41.4                        |                                                        | 82.0           | 58.6                     | 48.1                                              | 17.1                                        | 49  |
| ZnCr/SAPO-17, 4 Mpa                                   | 38.2          | 47.6                        |                                                        | 87.3           | 52.4                     | 45.7                                              | 17.5                                        | 34  |
| ZA-RP                                                 | 39.2          | 43.3                        |                                                        | 73.3           | 56.7                     | 41.6                                              | 16.3                                        | 48  |
| ZnCr/SAPO-34                                          | 40            |                             |                                                        |                |                          |                                                   | 16.4                                        | 46  |
| ZA-SP                                                 | 40.2          | 44.6                        |                                                        | 74.1           | 55.4                     | 41.1                                              | 16.5                                        | 48  |
| ZnCr/Low Si AlPO-18                                   | 43            |                             |                                                        |                |                          |                                                   | 18.1                                        | 46  |
| ZnCr/Low Si AlPO-18                                   | 43            |                             |                                                        |                |                          |                                                   | 18.9                                        | 46  |
| GaZrO <sub>x</sub>                                    | 44.5          | 42                          |                                                        | 89             | 58.0                     | 51.6                                              | 23.0                                        | 39  |
| ZnCrO <sub>x</sub> -SAPO 450-900μm                    | 47            | 41.0                        |                                                        | 72.0           | 59.0                     | 42.5                                              | 20.0                                        | 50  |
| ZnCrO <sub>x</sub> -SAPO-18 Si/Al = 0,054             | 47.1          | 41.8                        |                                                        | 61.0           | 58.2                     | 35.5                                              | 16.7                                        | 49  |
| ZnCr/Low Si AlPO-18                                   | 49            |                             |                                                        |                |                          |                                                   | 20.6                                        | 46  |
| ZnCr/Low Si AlPO-18                                   | 49            |                             |                                                        |                |                          |                                                   | 21.1                                        | 46  |
| ZnCrO <sub>x</sub> -SAPO-18 Si/Al = 0,045             | 49.5          | 40.9                        |                                                        | 69.0           | 59.1                     | 40.8                                              | 20.2                                        | 49  |
| ZnCrO <sub>x</sub> -SAPO 150-74μm                     | 58            | 40.0                        |                                                        | 72.0           | 60.0                     | 43.2                                              | 25.1                                        | 50  |
| ZnCr/SAPO-34                                          | 59            |                             |                                                        |                |                          |                                                   | 22.1                                        | 46  |
| ZnCrO <sub>x</sub> -SAPO 20-50μm                      | 59            | 39.0                        |                                                        | 65.0           | 61.0                     | 39.7                                              | 23.4                                        | 50  |
| ZnCrO <sub>x</sub> -SAPO 200-300μm                    | 60            | 39.0                        |                                                        | 76.0           | 61.0                     | 46.4                                              | 27.8                                        | 50  |
| ZnCrO <sub>x</sub> -GeAPO-18 <sub>0,027</sub>         | 85            | 32                          |                                                        | 83             | 68                       | 56.5                                              | 48                                          | 51  |
| <b>low CO<sub>2</sub> OX-ZEO:</b>                     |               |                             |                                                        |                |                          |                                                   |                                             |     |
| Zn <sub>0.3</sub> Ce <sub>2</sub> -yZryO <sub>4</sub> | 5             | 4.0                         |                                                        | 60             | 96.0                     | 57.6                                              | 2.9                                         | 52  |
| Zn <sub>0.3</sub> Ce <sub>2</sub> -yZryO <sub>4</sub> | 6.5           | 5.5                         |                                                        | 77             | 94.5                     | 72.8                                              | 4.7                                         | 52  |
| Zn <sub>0.3</sub> Ce <sub>2</sub> -yZryO <sub>4</sub> | 6.5           | 8.5                         |                                                        | 78             | 91.5                     | 71.4                                              | 4.6                                         | 52  |
| Zn <sub>0.3</sub> Ce <sub>2</sub> -yZryO <sub>4</sub> | 7             | 11.0                        |                                                        | 76             | 89.0                     | 67.6                                              | 4.7                                         | 52  |
| Zn <sub>0.3</sub> Ce <sub>2</sub> -yZryO <sub>4</sub> | 7             | 12.0                        |                                                        | 73             | 88.0                     | 64.2                                              | 4.5                                         | 52  |
| Zn <sub>0.3</sub> Ce <sub>2</sub> -yZryO <sub>4</sub> | 7             | 10.0                        |                                                        | 77             | 90.0                     | 69.3                                              | 4.9                                         | 52  |
| Zn <sub>0.3</sub> Ce <sub>2</sub> -yZryO <sub>4</sub> | 7             | 11.0                        |                                                        | 78             | 89.0                     | 69.4                                              | 4.9                                         | 52  |

**Table S4:** reported catalytic performance of bifunctional catalysts for the direct conversion of synthesis gas to C<sub>2</sub>-C<sub>4</sub> olefins via the OX-ZEO process (continued)

| catalyst                                                           | CO conversion | CO <sub>2</sub> selectivity | C <sub>2</sub> -C <sub>4</sub> olefins in hydrocarbons | hydrocarbons selectivity | C <sub>2</sub> -C <sub>4</sub> olefin selectivity | C <sub>2</sub> -C <sub>4</sub> olefin yield | ref |
|--------------------------------------------------------------------|---------------|-----------------------------|--------------------------------------------------------|--------------------------|---------------------------------------------------|---------------------------------------------|-----|
|                                                                    | %             | % <sub>c</sub>              | % <sub>c</sub>                                         | % <sub>c</sub>           | % <sub>c</sub>                                    | % <sub>c</sub>                              |     |
| Zn <sub>0.3</sub> Ce <sub>2</sub> -γZr <sub>y</sub> O <sub>4</sub> | 7             | 12.0                        | 75                                                     | 88.0                     | 66.0                                              | 4.6                                         | 52  |
| Zn <sub>0.3</sub> Ce <sub>2</sub> -γZr <sub>y</sub> O <sub>4</sub> | 7.5           | 13.0                        | 75                                                     | 87.0                     | 65.3                                              | 4.9                                         | 52  |
| Zn <sub>0.3</sub> Ce <sub>2</sub> -γZr <sub>y</sub> O <sub>4</sub> | 7.5           | 12.0                        | 75                                                     | 88.0                     | 66.0                                              | 5.0                                         | 52  |
| Zn <sub>0.3</sub> Ce <sub>2</sub> -γZr <sub>y</sub> O <sub>4</sub> | 8             | 15.0                        | 75                                                     | 85.0                     | 63.8                                              | 5.1                                         | 52  |
| Zn <sub>0.3</sub> Ce <sub>2</sub> -γZr <sub>y</sub> O <sub>4</sub> | 8             | 12.5                        | 72                                                     | 87.5                     | 63.0                                              | 5.0                                         | 52  |
| Zn <sub>0.3</sub> Ce <sub>2</sub> -γZr <sub>y</sub> O <sub>4</sub> | 9             | 22.0                        | 76                                                     | 78.0                     | 59.3                                              | 5.3                                         | 52  |
| Zn <sub>0.3</sub> Ce <sub>2</sub> -γZr <sub>y</sub> O <sub>4</sub> | 10            | 23.0                        | 72                                                     | 77.0                     | 55.4                                              | 5.5                                         | 52  |
| Zn-Cr@SAPO capsule catalyst                                        | 10.4          | 36.0                        | 63.8                                                   | 64.0                     | 40.8                                              | 4.2                                         | 53  |
| Zn <sub>0.3</sub> Ce <sub>2</sub> -γZr <sub>y</sub> O <sub>4</sub> | 12            | 26.0                        | 59                                                     | 74.0                     | 43.7                                              | 5.2                                         | 52  |

**Table S5:** reported catalytic performance of FTO catalysts for the direct conversion of synthesis gas to C<sub>2</sub>-C<sub>4</sub> olefins

| catalyst                                                                       | CO conversion | CO <sub>2</sub> selectivity | C <sub>2</sub> -C <sub>4</sub> olefins in hydrocarbons | hydrocarbon selectivity | C <sub>2</sub> -C <sub>4</sub> olefin selectivity | C <sub>2</sub> -C <sub>4</sub> olefin yield | ref |
|--------------------------------------------------------------------------------|---------------|-----------------------------|--------------------------------------------------------|-------------------------|---------------------------------------------------|---------------------------------------------|-----|
|                                                                                | %             | % <sub>c</sub>              | % <sub>c</sub>                                         | % <sub>c</sub>          | % <sub>c</sub>                                    | % <sub>c</sub>                              |     |
| <b>FTO</b>                                                                     |               |                             |                                                        |                         |                                                   |                                             |     |
| CoMn carbide nano prisms                                                       | 6.3           | 48.3                        | 45.1                                                   | 51.7                    | 23.3                                              | 1.5                                         | 54  |
| Fe/SiO <sub>2</sub>                                                            | 10.1          | 29.0                        | 29.6                                                   | 71.0                    | 21.0                                              | 2.1                                         | 55  |
| CoMn carbide nano prisms                                                       | 11.5          | 48.0                        | 50.0                                                   | 52.0                    | 26.0                                              | 3.0                                         | 54  |
| CoMn carbide nano prisms                                                       | 14.3          | 48.4                        | 44.3                                                   | 51.6                    | 22.9                                              | 3.3                                         | 54  |
| Co <sub>1</sub> Mn <sub>3</sub> -Na <sub>2</sub> S                             | 18            | 3.0                         | 30.0                                                   | 97.0                    | 29.1                                              | 5.2                                         | 56  |
| Co <sub>1</sub> Mn <sub>3</sub> -Na <sub>2</sub> S <sub>2</sub> O <sub>3</sub> | 22            | 3.0                         | 25.0                                                   | 97.0                    | 24.3                                              | 5.3                                         | 56  |
| CoMn carbide nano prisms                                                       | 23.6          | 48.0                        | 41.2                                                   | 52.0                    | 21.4                                              | 5.1                                         | 54  |
| Co <sub>3</sub> Mn <sub>1</sub> -Na <sub>2</sub> S                             | 25            | 13.0                        | 20.0                                                   | 87.0                    | 17.4                                              | 4.4                                         | 56  |
| N5 @340°C                                                                      | 27.4          | 47.8                        | 43.0                                                   | 52.2                    | 22.4                                              | 6.2                                         | 57  |
| CoMn carbide nano prisms                                                       | 28.6          | 46.6                        | 31.9                                                   | 53.4                    | 17.0                                              | 4.9                                         | 54  |
| Co <sub>3</sub> Mn <sub>1</sub>                                                | 31            | 2.0                         | 17.0                                                   | 98.0                    | 16.7                                              | 5.2                                         | 56  |
| CoMn carbide nano prisms                                                       | 31.8          | 47.3                        | 60.8                                                   | 52.7                    | 32.0                                              | 10.2                                        | 54  |
| 6Fe                                                                            | 32.7          | 21.2                        | 17.5                                                   | 78.8                    | 13.8                                              | 4.5                                         | 58  |
| 4Fe-Zn                                                                         | 34.1          | 33.1                        | 13.3                                                   | 66.9                    | 8.9                                               | 3.0                                         | 58  |
| N1 @340°C                                                                      | 38.3          | 48.0                        | 52.1                                                   | 52.0                    | 27.1                                              | 10.4                                        | 57  |
| 5Fe-1.2Na                                                                      | 48.7          | 21.9                        | 20.3                                                   | 78.1                    | 15.9                                              | 7.7                                         | 58  |
| FeBi/CNT                                                                       | 50.7          | 46.0                        | 36.1                                                   | 54.0                    | 19.5                                              | 9.9                                         | 55  |
| 2Fe.Zn0.2Na (SC-I)3                                                            | 52.3          | 41.9                        | 50.5                                                   | 58.1                    | 29.3                                              | 15.3                                        | 59  |
| FePb/CNT                                                                       | 56.8          | 48.0                        | 35.8                                                   | 52.0                    | 18.6                                              | 10.6                                        | 55  |
| Fe/CNT                                                                         | 57.3          | 40.0                        | 32.4                                                   | 60.0                    | 19.4                                              | 11.1                                        | 55  |
| 2Fe.Zn0.2Na (AH-I)                                                             | 60.2          | 39.1                        | 47.7                                                   | 60.9                    | 29.0                                              | 17.5                                        | 59  |
| 1Fe-Zn-3.4Na                                                                   | 63            | 22.5                        | 19.9                                                   | 77.5                    | 15.4                                              | 9.7                                         | 58  |
| 5AFeP                                                                          | 69            | 45.0                        | 51.0                                                   | 55.0                    | 28.1                                              | 19.4                                        | 60  |
| 2Fe-Zn-0.81Na                                                                  | 77.2          | 23.8                        | 22.7                                                   | 76.2                    | 17.3                                              | 13.4                                        | 58  |
| FeBi/CNT                                                                       | 78.3          | 47.0                        | 35.2                                                   | 53.0                    | 18.7                                              | 14.6                                        | 55  |
| 2Fe.Zn0.2Na (SC-I)2                                                            | 79.3          | 40.6                        | 50.3                                                   | 59.4                    | 29.9                                              | 23.7                                        | 59  |
| 2Fe.Zn0.1Na (AH-I)                                                             | 81.1          | 39.25                       | 42.8                                                   | 60.8                    | 26.0                                              | 21.1                                        | 59  |
| 3Fe-Zn-0.36Na                                                                  | 82.7          | 25.9                        | 22.9                                                   | 74.1                    | 16.9                                              | 14.0                                        | 58  |
| 10IMP                                                                          | 86            | 47.0                        | 52.0                                                   | 53.0                    | 27.6                                              | 23.7                                        | 61  |
| N5 @370°C                                                                      | 87.8          | 44.7                        | 34.4                                                   | 55.3                    | 19.0                                              | 16.7                                        | 57  |
| N1 @370°C                                                                      | 90            | 46.3                        | 37.3                                                   | 53.7                    | 20.0                                              | 18.0                                        | 57  |
| FePb/CNT                                                                       | 96            | 50.0                        | 28.4                                                   | 50.0                    | 14.2                                              | 13.6                                        | 55  |
| 2Fe.Zn0.2Na (SC-I)1                                                            | 97.4          | 34.4                        | 50                                                     | 65.6                    | 32.8                                              | 31.9                                        | 59  |
| <b>low CO<sub>2</sub> FTO:</b>                                                 |               |                             |                                                        |                         |                                                   |                                             |     |
| FeZn@16.9-SiO <sub>2</sub> -c                                                  | 52.2          | 8.5                         | 44.5                                                   | 91.5                    | 40.7                                              | 21.2                                        | 62  |

**Table S5:** reported catalytic performance of FTO catalysts for the direct conversion of synthesis gas to C<sub>2</sub>-C<sub>4</sub> olefins (continued)

| catalyst                     | CO conversion | CO <sub>2</sub> selectivity | C <sub>2</sub> -C <sub>4</sub> olefins in hydrocarbons | hydrocarbon selectivity | C <sub>2</sub> -C <sub>4</sub> olefin selectivity | C <sub>2</sub> -C <sub>4</sub> olefin yield | ref |
|------------------------------|---------------|-----------------------------|--------------------------------------------------------|-------------------------|---------------------------------------------------|---------------------------------------------|-----|
|                              | %             | % <sub>c</sub>              | % <sub>c</sub>                                         | % <sub>c</sub>          | % <sub>c</sub>                                    | % <sub>c</sub>                              |     |
| Fe@SAPO-34                   | 55.4          | 17.1                        | 52.6                                                   | 82.9                    | 43.6                                              | 24.2                                        | 63  |
| FeZn@7.3-SiO <sub>2</sub> -c | 63.1          | 8.8                         | 47.3                                                   | 91.2                    | 43.1                                              | 27.2                                        | 62  |
| FeZn@4.1-SiO <sub>2</sub> -c | 65.3          | 7.2                         | 52.6                                                   | 92.8                    | 48.8                                              | 31.9                                        | 62  |
| FeZn@2.4-SiO <sub>2</sub> -c | 77.8          | 11.9                        | 50.7                                                   | 88.1                    | 44.7                                              | 34.8                                        | 62  |
| FeZn@1.3-SiO <sub>2</sub> -c | 82.3          | 17.2                        | 50.4                                                   | 82.8                    | 41.7                                              | 34.3                                        | 62  |

**Table S6:** combined reported catalytic performance of catalysts for the conversion of synthesis gas to C<sub>2</sub>-C<sub>4</sub> olefins via a dual reactor process

| catalyst                              | CO conversion | CO <sub>2</sub> selectivity | methanol selectivity | C <sub>2</sub> -C <sub>4</sub> olefin selectivity from methanol | C <sub>2</sub> -C <sub>4</sub> olefin selectivity from synthesis gas | yield          | ref |
|---------------------------------------|---------------|-----------------------------|----------------------|-----------------------------------------------------------------|----------------------------------------------------------------------|----------------|-----|
|                                       | %             | % <sub>c</sub>              | % <sub>c</sub>       | % <sub>c</sub>                                                  | % <sub>c</sub>                                                       | % <sub>c</sub> |     |
| <b>dual reactor process</b>           |               |                             |                      |                                                                 |                                                                      |                |     |
| <b>MeOH</b>                           |               |                             |                      |                                                                 |                                                                      |                |     |
| Cu/ZnO/Al <sub>2</sub> O <sub>3</sub> | 8.6           |                             | 97.7                 |                                                                 |                                                                      | 8.4            | 30  |
| 2Cu_MCF 10.7                          | 10.7          |                             | 97.0                 |                                                                 |                                                                      | 10.4           | 31  |
| Cu/ZnO/Al <sub>2</sub> O <sub>3</sub> | 29.9          |                             | 99.6                 |                                                                 |                                                                      | 29.8           | 30  |
| Cu/ZnO/Al <sub>2</sub> O <sub>3</sub> | 34.4          |                             | 99.8                 |                                                                 |                                                                      | 34.3           | 30  |
| Cu/ZnO/Al <sub>2</sub> O <sub>3</sub> | 40.3          |                             | 98.7                 |                                                                 |                                                                      | 39.8           | 30  |
| Cu/ZnO/Al <sub>2</sub> O <sub>3</sub> | 47.0          |                             | 98.9                 |                                                                 |                                                                      | 46.5           | 30  |
| <b>MeOH + MTO</b>                     |               |                             |                      |                                                                 |                                                                      |                |     |
| SSZ-13                                | 8.6           | 0.0                         |                      | 94.1                                                            | 91.9                                                                 | 7.9            | 64  |
| meso-Z                                | 8.6           | 0.0                         |                      | 95.5                                                            | 93.3                                                                 | 8.0            | 64  |
| meso-Z-22-4-4                         | 8.6           | 0.0                         |                      | 93.5                                                            | 91.3                                                                 | 7.9            | 64  |
| meso-Z-22-4-4-sil                     | 8.6           | 0.0                         |                      | 94.2                                                            | 92.0                                                                 | 7.9            | 64  |
| SSZ-13                                | 10.7          | 0.0                         |                      | 94.1                                                            | 91.3                                                                 | 9.8            | 64  |
| meso-Z                                | 10.7          | 0.0                         |                      | 95.5                                                            | 92.6                                                                 | 9.9            | 64  |
| meso-Z-22-4-4                         | 10.7          | 0.0                         |                      | 93.5                                                            | 90.7                                                                 | 9.7            | 64  |
| meso-Z-22-4-4-sil                     | 10.7          | 0.0                         |                      | 94.2                                                            | 91.4                                                                 | 9.8            | 64  |
| SSZ-13                                | 29.9          | 0.0                         |                      | 94.1                                                            | 93.7                                                                 | 28.0           | 64  |
| meso-Z                                | 29.9          | 0.0                         |                      | 95.5                                                            | 95.1                                                                 | 28.4           | 64  |
| meso-Z-22-4-4                         | 29.9          | 0.0                         |                      | 93.5                                                            | 93.1                                                                 | 27.8           | 64  |
| meso-Z-22-4-4-sil                     | 29.9          | 0.0                         |                      | 94.2                                                            | 93.8                                                                 | 28.1           | 64  |
| SSZ-13                                | 34.4          | 0.0                         |                      | 94.1                                                            | 93.9                                                                 | 32.3           | 64  |
| meso-Z                                | 34.4          | 0.0                         |                      | 95.5                                                            | 95.3                                                                 | 32.8           | 64  |
| meso-Z-22-4-4                         | 34.4          | 0.0                         |                      | 93.5                                                            | 93.3                                                                 | 32.1           | 64  |
| meso-Z-22-4-4-sil                     | 34.4          | 0.0                         |                      | 94.2                                                            | 94.0                                                                 | 32.3           | 64  |
| SSZ-13                                | 40.3          | 0.0                         |                      | 94.1                                                            | 92.9                                                                 | 37.4           | 64  |
| meso-Z                                | 40.3          | 0.0                         |                      | 95.5                                                            | 94.3                                                                 | 38.0           | 64  |
| meso-Z-22-4-4                         | 40.3          | 0.0                         |                      | 93.5                                                            | 92.3                                                                 | 37.2           | 64  |
| meso-Z-22-4-4-sil                     | 40.3          | 0.0                         |                      | 94.2                                                            | 93.0                                                                 | 37.5           | 64  |
| SSZ-13                                | 47.0          | 0.0                         |                      | 94.1                                                            | 93.1                                                                 | 43.7           | 64  |
| meso-Z                                | 47.0          | 0.0                         |                      | 95.5                                                            | 94.4                                                                 | 44.4           | 64  |
| meso-Z-22-4-4                         | 47.0          | 0.0                         |                      | 93.5                                                            | 92.5                                                                 | 43.5           | 64  |
| meso-Z-22-4-4-sil                     | 47.0          | 0.0                         |                      | 94.2                                                            | 93.2                                                                 | 43.8           | 64  |



### 3. Aromatics

The overall selectivity of the conversion of synthesis gas to aromatics was analyzed analog to the selectivity of C<sub>2</sub>-C<sub>4</sub> olefins (Equation 8 and Equation 9).

$$Y(\text{aromatics}) = \frac{n_{\text{out}}(C_{\text{aromatics}})}{n_{\text{in}}(CO_x)} \quad \text{Equation 8}$$

$$S(\text{aromatics}) = \frac{Y(\text{aromatics})}{X(CO_x)} \quad \text{Equation 9}$$

Where,

*Y*:yield

$\dot{n}_{\text{out}}$ :molar flow at reactor outlet

$\dot{n}_{\text{in}}$ :molar flow at reactor inlet

$C_{\text{aromatics}}$ :carbon atoms in aromatic molecules

*S*:selectivity

*X*:conversion

The following processes were analyzed: OX-ZEO, combination of FTO catalysts with zeolites and a dual reactor process. The OX-XEO process also includes recent studies with decreased water-gas-shift activity and are labeled with *low* CO<sub>2</sub>. The dual reactor approach shows the combination of methanol synthesis with consecutive methanol-to-aromatics (MTA) reaction in separate processes. Additionally, the resulting yields of a combination of methanol synthesis and MTA process that follows dehydrogenation is added. The calculation of the aromatic yields can be found in Table S7 (OX-ZEO), Table S8 (FTO + zeolite) and Table S9 (dual reactor process).

**Table S7:** reported catalytic performance of bifunctional catalysts for the direct conversion of synthesis gas to aromatics via the OX-ZEO process

| catalyst                                                          | CO conversion | CO <sub>2</sub> selectivity | aromatics in hydrocarbons | hydrocarbon selectivity | aromatics selectivity | aromatics yield | ref |
|-------------------------------------------------------------------|---------------|-----------------------------|---------------------------|-------------------------|-----------------------|-----------------|-----|
|                                                                   | %             | % <sub>c</sub>              | % <sub>c</sub>            | % <sub>c</sub>          | % <sub>c</sub>        | % <sub>c</sub>  |     |
| <b>OX-ZEO</b>                                                     |               |                             |                           |                         |                       |                 |     |
| ZrO <sub>2</sub>                                                  | 3             | 34.0                        | 49.0                      | 66.0                    | 32.3                  | 1.0             | 65  |
| Ce <sub>0.2</sub> Zr <sub>0.8</sub> O <sub>2</sub> /H-ZSM5-40-350 | 4             | 28.0                        | 86.0                      | 72.0                    | 61.9                  | 2.5             | 65  |
| 80Ce-ZrO <sub>2</sub>                                             | 4.8           | 34.0                        | 69.0                      | 66.0                    | 45.5                  | 2.2             | 65  |
| CeO <sub>2</sub>                                                  | 4.8           | 34.0                        | 59.0                      | 66.0                    | 38.9                  | 1.9             | 65  |
| 20Ce-ZrO <sub>2</sub>                                             | 5.1           | 34.0                        | 75.0                      | 66.0                    | 49.5                  | 2.5             | 65  |
| Ce <sub>0.2</sub> Zr <sub>0.8</sub> O <sub>2</sub> /H-ZSM5-40-380 | 5.5           | 33.0                        | 83.0                      | 67.0                    | 55.6                  | 3.1             | 65  |
| 40Ce-ZrO <sub>2</sub>                                             | 5.8           | 34.0                        | 74.0                      | 66.0                    | 48.8                  | 2.8             | 65  |
| 50% ZnCrO <sub>x</sub> + 50% H-ZSM-5                              | 6.4           | 49.0                        | 63.9                      | 51.0                    | 32.6                  | 2.1             | 66  |
| Ce <sub>0.2</sub> Zr <sub>0.8</sub> O <sub>2</sub> /H-ZSM5-40-400 | 7.5           | 33.0                        | 77.0                      | 67.0                    | 51.6                  | 3.9             | 65  |
| 20Ce-ZrO <sub>2</sub>                                             | 8             | 34.0                        | 83.0                      | 66.0                    | 54.8                  | 4.4             | 65  |
| 40Ce-ZrO <sub>2</sub>                                             | 8             | 34.0                        | 72.0                      | 66.0                    | 47.5                  | 3.8             | 65  |
| ZnAlO <sub>x</sub> /H-ZSM-5H                                      | 8.5           | 44                          | 79                        | 56.0                    | 44.2                  | 3.8             | 67  |
| 80Ce-ZrO <sub>2</sub>                                             | 9             | 34.0                        | 69.0                      | 66.0                    | 45.5                  | 4.1             | 65  |
| Ce <sub>0.2</sub> Zr <sub>0.8</sub> O <sub>2</sub> /H-ZSM5-40-450 | 10            | 35.0                        | 56.0                      | 65.0                    | 36.4                  | 3.6             | 65  |
| CeO <sub>2</sub>                                                  | 11            | 34.0                        | 58.0                      | 66.0                    | 38.3                  | 4.2             | 65  |
| 50% ZnCrO <sub>x</sub> + 50% H-ZSM-5                              | 11.2          | 49.0                        | 70.4                      | 51.0                    | 35.9                  | 4.0             | 66  |
| MgZrO <sub>x</sub> /HZSM5-350°C                                   | 12.5          | 17                          | 68.7                      | 83.0                    | 57.0                  | 7.1             | 68  |
| t-ZrO <sub>2</sub> /HZSM-5-mix                                    | 14.2          | 33.5                        | 65.0                      | 66.5                    | 43.2                  | 6.1             | 69  |
| 50% ZnCrO <sub>x</sub> + 50% H-ZSM-5                              | 14.7          | 49.0                        | 69.8                      | 51.0                    | 35.6                  | 5.2             | 66  |
| ZnCr <sub>2</sub> O <sub>4</sub> -600&H-ZSM-5                     | 14.7          | 48.0                        | 70.2                      | 52.0                    | 36.5                  | 5.4             | 70  |
| 50% ZnCrO <sub>x</sub> + 50% H-ZSM-5                              | 15.4          | 49.0                        | 67.0                      | 51.0                    | 34.2                  | 5.3             | 66  |
| MgZrO <sub>x</sub> /HZSM5-400°C                                   | 15.5          | 18                          | 81.7                      | 82.0                    | 67.0                  | 10.4            | 68  |
| ZnCrO ZSM-5 powder mixing                                         | 16.1          | 43.0                        | 74.0                      | 57.0                    | 42.2                  | 6.8             | 71  |
| ZnCr <sub>2</sub> O <sub>4</sub> /Sbx-H-ZSM-5                     | 17            | 47.5                        | 83                        | 52.5                    | 43.6                  | 7.4             | 72  |
| ZnCrO x -ZSM-5-2.8                                                | 18.3          | 49.0                        | 69.0                      | 51.0                    | 35.2                  | 6.4             | 73  |
| MgZrO <sub>x</sub> /HZSM5-450°C                                   | 20.5          | 21                          | 60.2                      | 79.0                    | 47.5                  | 9.7             | 68  |
| Zn-ZrO <sub>2</sub> /H-ZSM-5                                      | 21            | 42.0                        | 81.0                      | 58.0                    | 47.0                  | 9.9             | 74  |
| ZO.8C/s-Z5-150                                                    | 21            | 36                          | 56.5                      | 64.0                    | 36.2                  | 7.6             | 75  |
| ZrO <sub>2</sub> -H&H-ZSM-5                                       | 21.6          | 44.3                        | 52.4                      | 55.7                    | 29.2                  | 6.3             | 76  |
| Mo-ZrO <sub>2</sub> /H-ZSM-5                                      | 22            | 42.0                        | 74.0                      | 58.0                    | 42.9                  | 9.4             | 77  |
| Ce <sub>0.2</sub> Zr <sub>0.8</sub> O <sub>2</sub> /H-ZSM5-40     | 22.4          | 34.1                        | 56.3                      | 65.9                    | 37.1                  | 8.3             | 65  |
| ZnCr <sub>2</sub> O <sub>4</sub> -500&H-ZSM-5                     | 23            | 47.8                        | 73.3                      | 52.2                    | 38.3                  | 8.8             | 70  |
| ZnCr <sub>2</sub> O <sub>4</sub> -400&H-ZSM-5                     | 23.6          | 46.9                        | 76.0                      | 53.1                    | 40.4                  | 9.5             | 70  |
| m-ZrO <sub>2</sub> /HZSM-5-mix                                    | 24            | 36.4                        | 67.4                      | 63.6                    | 42.9                  | 10.3            | 69  |
| ZO.8C/c-Z5-150                                                    | 25            | 35                          | 70                        | 65.0                    | 45.5                  | 11.4            | 75  |

**Table S7:** reported catalytic performance of bifunctional catalysts for the direct conversion of synthesis gas to aromatics via the OX-ZEO process (continued)

| catalyst                         | CO conversion | CO <sub>2</sub> selectivity | aromatics in hydrocarbons | hydrocarbon selectivity | aromatics selectivity | aromatics yield | ref |
|----------------------------------|---------------|-----------------------------|---------------------------|-------------------------|-----------------------|-----------------|-----|
|                                  | %             | % <sub>c</sub>              | % <sub>c</sub>            | % <sub>c</sub>          | % <sub>c</sub>        | % <sub>c</sub>  |     |
| Ce0.2Zr0.8O2/H-ZSM5-40           | 27.8          | 35.1                        | 57.0                      | 64.9                    | 37.0                  | 10.3            | 65  |
| ZO.8C/n-Z5-150                   | 28            | 36.5                        | 62                        | 63.5                    | 39.4                  | 11.0            | 75  |
| ZO.8C/i-Z5-150                   | 28            | 36.5                        | 64                        | 63.5                    | 40.6                  | 11.4            | 75  |
| 2.89%Fe-Zn/Cr+ZSM-5              | 36            | 45.5                        | 82.5                      | 54.5                    | 45.0                  | 16.2            | 78  |
| 4.48%Fe-Zn/Cr+ZSM-5              | 45            | 46.5                        | 81                        | 53.5                    | 43.3                  | 19.5            | 78  |
| Cr/Zn-Zn/Z5@S1 hybrid            | 55            |                             |                           | 100.0                   | 35.7                  | 19.6            | 79  |
| <b>low CO<sub>2</sub> OX-ZEO</b> |               |                             |                           |                         |                       |                 |     |
| ZnO-ZrO2/H-ZSM-5                 | 11            | 0.0                         | 72.0                      | 100.0                   | 72.0                  | 7.9             | 80  |
| ZnO-ZrO2/H-ZSM-5                 | 15            | 5.0                         | 71.0                      | 95.0                    | 67.5                  | 10.1            | 80  |
| Cr2O3/Mg-ZSM-5@SiO2              | 17.4          | 0.0                         | 64.9                      | 100.0                   | 64.9                  | 11.3            | 81  |
| Cr2O3/La-ZSM-5@SiO2              | 17.5          | 0.0                         | 72.2                      | 100.0                   | 72.2                  | 12.6            | 81  |
| Cr2O3/H-ZSM-5@SiO2-56.1%         | 17.8          | 0.0                         | 68.2                      | 100.0                   | 68.2                  | 12.2            | 81  |
| Cr2O3/H-ZSM-5@SiO2-13.8%         | 19.5          | 0.0                         | 68.0                      | 100.0                   | 68.0                  | 13.3            | 81  |
| Cr2O3/H-ZSM-5@SiO2-39.0%         | 19.7          | 0.0                         | 69.3                      | 100.0                   | 69.3                  | 13.7            | 81  |
| Cr2O3/H-ZSM-5@SiO2               | 19.7          | 0.0                         | 69.3                      | 100.0                   | 69.3                  | 13.7            | 81  |
| Cr2O3/Zn-ZSM-5@SiO2              | 22.8          | 0.0                         | 71.4                      | 100.0                   | 71.4                  | 16.3            | 81  |
| Cr2O3/Ga-ZSM-5@SiO2              | 24.6          | 0.0                         | 76.4                      | 100.0                   | 76.4                  | 18.8            | 81  |

**Table S8:** reported catalytic performance of bifunctional catalysts for the direct conversion of synthesis gas to aromatics by combining FTO catalysts and zeolites

| catalyst                                              | CO conversion | CO <sub>2</sub> selectivity | aromatics in hydrocarbons | hydrocarbon selectivity | aromatics selectivity | aromatics yield | ref |
|-------------------------------------------------------|---------------|-----------------------------|---------------------------|-------------------------|-----------------------|-----------------|-----|
|                                                       | %             | % <sub>c</sub>              | % <sub>c</sub>            | % <sub>c</sub>          | % <sub>c</sub>        | % <sub>c</sub>  |     |
| <b>Fe+Z</b>                                           |               |                             |                           |                         |                       |                 |     |
| FeMn-HZSM-5                                           | 6.7           | 26.3                        | 36.5                      | 73.7                    | 26.9                  | 1.8             | 82  |
| CMA   Z-300                                           | 17.5          | 29.9                        | 38.8                      | 70.1                    | 27.2                  | 4.8             | 83  |
| FeMn-HZSM-5                                           | 19.9          | 35.1                        | 36.5                      | 64.9                    | 23.7                  | 4.7             | 82  |
| FeMn-HZSM-5                                           | 23.1          | 22.1                        | 39.4                      | 77.9                    | 30.7                  | 7.1             | 82  |
| CMA   Z-300                                           | 23.7          | 34.0                        | 43.3                      | 66.0                    | 28.6                  | 6.8             | 83  |
| FeMn-HZSM-5                                           | 24.9          | 34.6                        | 24.2                      | 65.4                    | 15.8                  | 3.9             | 82  |
| α-Fe <sub>2</sub> O <sub>3</sub> -0.75Na/HZSM-5       | 25.3          | 41.5                        | 36.2                      | 58.5                    | 21.2                  | 5.4             | 84  |
| FeNiOx(5:1)-0.41Na/HZSM-5                             | 32.3          | 47.4                        | 44.8                      | 52.6                    | 23.6                  | 7.6             | 84  |
| CMA   Z-300                                           | 34.9          | 39.6                        | 55.5                      | 60.4                    | 33.5                  | 11.7            | 83  |
| CMA   Z-300                                           | 35.8          | 38.5                        | 31.0                      | 61.5                    | 19.1                  | 6.8             | 83  |
| CMA   Z-300                                           | 36.4          | 37.5                        | 57.0                      | 62.5                    | 35.6                  | 13.0            | 83  |
| FeMn-HZSM-5                                           | 39.9          | 47.6                        | 43.4                      | 52.4                    | 22.7                  | 9.1             | 82  |
| FeMnOx(5:1)-0.4Na/HZSM-5                              | 42.1          | 45.4                        | 28.3                      | 54.6                    | 15.5                  | 6.5             | 84  |
| FeMn-HZSM-5                                           | 44.6          | 33.7                        | 37.9                      | 66.3                    | 25.1                  | 11.2            | 82  |
| FeNiOx(5:1)-0.87Na/HZSM-5                             | 46.3          | 46.6                        | 36.2                      | 53.4                    | 19.3                  | 9.0             | 84  |
| FeMn-HZSM-5                                           | 46.6          | 42.0                        | 33.9                      | 58.0                    | 19.7                  | 9.2             | 82  |
| FeNiOx(5:1)-0.87Na/HZSM-5                             | 47.2          | 46.6                        | 23.4                      | 53.4                    | 12.5                  | 5.9             | 84  |
| FeMn@MZ5                                              | 51.9          | 36.6                        | 47.1                      | 63.4                    | 29.9                  | 15.5            | 85  |
| Fe <sub>10</sub> Mn <sub>1</sub> KSi-Hol HZSM-5 (27)  | 53.4          | 49.4                        | 33.8                      | 50.6                    | 17.1                  | 9.1             | 86  |
| Fe <sub>1</sub> Mn <sub>0.5</sub> @MZ5-(89)           | 57            | 38.0                        | 59.0                      | 62.0                    | 36.6                  | 20.9            | 85  |
| FeMn-HZSM-5                                           | 60.4          | 42.8                        | 34.1                      | 57.2                    | 19.5                  | 11.8            | 82  |
| FeMn-HZSM-5                                           | 60.4          | 42.8                        | 34.1                      | 57.2                    | 19.5                  | 11.8            | 82  |
| CMA   Z-300                                           | 68.9          | 41.6                        | 59.1                      | 58.4                    | 34.5                  | 23.8            | 83  |
| FeMn-HZSM-5                                           | 69.9          | 45.5                        | 32.4                      | 54.5                    | 17.7                  | 12.3            | 82  |
| FeMnK/SiO <sub>2</sub> +HZSM-5 powder mix.            | 74            | 47.0                        | 29.0                      | 53.0                    | 15.4                  | 11.4            | 87  |
| CMA/Hol-Z5-N@S1                                       | 75            | 41                          | 61                        | 59.0                    | 36.0                  | 27.0            | 88  |
| FeMnK/SiO <sub>2</sub> +HZSM-5 dual bed               | 77            | 48.0                        | 23.0                      | 52.0                    | 12.0                  | 9.2             | 87  |
| FeMn-HZSM-5                                           | 79.1          | 43.7                        | 38.0                      | 56.3                    | 21.4                  | 16.9            | 82  |
| FeMn-HZSM-5                                           | 81.1          | 40.9                        | 40.7                      | 59.1                    | 24.1                  | 19.5            | 82  |
| Fe <sub>10</sub> Mn <sub>0</sub> KSi-Hol HZSM-5 (27)  | 82.5          | 47.5                        | 33.5                      | 52.5                    | 17.6                  | 14.5            | 86  |
| 3Fe:1Cu:0.5Co/HZ, calc 700°C                          | 83            | 32.0                        | 37.0                      | 68.0                    | 25.2                  | 20.9            | 89  |
| Fe <sub>10</sub> Mn <sub>5</sub> KSi-Hol HZSM-5 (27)  | 83.8          | 46.8                        | 37.7                      | 53.2                    | 20.0                  | 16.8            | 86  |
| FeMnK/SiO <sub>2</sub> +HZSM-5 gran. mix.             | 84            | 47.0                        | 26.0                      | 53.0                    | 13.8                  | 11.6            | 87  |
| FeMnOx(5:1)-0.4Na/HZSM-5                              | 84.1          | 45.4                        | 15.7                      | 54.6                    | 8.6                   | 7.2             | 84  |
| Fe <sub>10</sub> Mn <sub>10</sub> KSi-Hol HZSM-5 (27) | 85.9          | 47.1                        | 38.2                      | 52.9                    | 20.2                  | 17.3            | 86  |

**Table S8:** reported catalytic performance of bifunctional catalysts for the direct conversion of synthesis gas to aromatics by combining FTO catalysts and zeolites (continued)

| catalyst                               | CO conversion | CO <sub>2</sub> selectivity | aromatics in hydrocarbons | hydrocarbon selectivity | aromatics selectivity | aromatics yield | ref |
|----------------------------------------|---------------|-----------------------------|---------------------------|-------------------------|-----------------------|-----------------|-----|
|                                        | %             | % <sub>c</sub>              | % <sub>c</sub>            | % <sub>c</sub>          | % <sub>c</sub>        | % <sub>c</sub>  |     |
| FeMn-HZSM-5                            | 86.7          | 41.2                        | 34.2                      | 58.8                    | 20.1                  | 17.4            | 82  |
| FeMn-HZSM-5                            | 86.8          | 46.9                        | 24.0                      | 53.1                    | 12.7                  | 11.1            | 82  |
| 3Fe:1Cu:0.5Co/HZ, 3500 h-1             | 88            | 34.0                        | 28.0                      | 66.0                    | 18.5                  | 16.3            | 89  |
| FeZnNa@0.6-HZSM-5-a                    | 88.8          | 27.5                        | 50.6                      | 72.5                    | 36.7                  | 32.6            | 90  |
| FeZnNa@0.6-HZSM-5                      | 89.2          | 26.9                        | 40.5                      | 73.1                    | 29.6                  | 26.4            | 90  |
| 3Fe:1Cu:0.5Co/HZ, calc 350°C           | 90            | 26.0                        | 40.0                      | 74.0                    | 29.6                  | 26.6            | 89  |
| 3Fe:2Cu/HZ                             | 92.5          | 32.0                        | 38.0                      | 68.0                    | 25.8                  | 23.9            | 89  |
| 3Fe:1Cu:0.5Co/HZ, 2 Mpa                | 92.5          | 16.0                        | 30.0                      | 84.0                    | 25.2                  | 23.3            | 89  |
| 3Fe:2Cu:0.5Co/HZ                       | 93            | 30.0                        | 39.0                      | 70.0                    | 27.3                  | 25.4            | 89  |
| 3Fe:1Cu:0.5Co/HZ, calc 400°C           | 93            | 25.0                        | 44.0                      | 75.0                    | 33.0                  | 30.7            | 89  |
| 3Fe:1Cu:0.5Co/HZ, calc 600°C           | 93            | 25.0                        | 45.0                      | 75.0                    | 33.8                  | 31.4            | 89  |
| 3Fe:1Cu:0.5Co/HZ, 2500 h-1             | 93            | 26.0                        | 43.0                      | 74.0                    | 31.8                  | 29.6            | 89  |
| FeMnOx(5:1)-0.4Na/HZSM-5               | 93.7          | 45.3                        | 26.0                      | 54.7                    | 14.2                  | 13.3            | 84  |
| 3Fe:1Cu:0.5Co/HZ, 320°C                | 94            | 23.0                        | 40.0                      | 77.0                    | 30.8                  | 29.0            | 89  |
| 3Fe:1Cu:0.5Co/HZ, 1000 h-1             | 94            | 17.0                        | 40.0                      | 83.0                    | 33.2                  | 31.2            | 89  |
| 3Fe:1Cu:0.5Co/HZ, calc 450°C           | 95            | 26.0                        | 46.0                      | 74.0                    | 34.0                  | 32.3            | 89  |
| 3Fe:1Cu:0.5Co/HZ, H <sub>2</sub> /CO=1 | 95            | 29.0                        | 43.0                      | 71.0                    | 30.5                  | 29.0            | 89  |
| 3Fe:1Cu:0.5Co/HZ, 3 Mpa                | 95            | 18.0                        | 43.0                      | 82.0                    | 35.3                  | 33.5            | 89  |
| Fe/HZ                                  | 96            | 36.0                        | 31.0                      | 64.0                    | 19.8                  | 19.0            | 89  |
| 3Fe:1Cu:0.5Co/HZ, 330°C                | 96            | 22.0                        | 45.0                      | 78.0                    | 35.1                  | 33.7            | 89  |
| KF80M                                  | 96.4          | 36.9                        | 34.1                      | 63.1                    | 21.5                  | 20.7            | 91  |
| 3Fe:1Cu:0.5Co/HZ                       | 97            | 23.0                        | 53.0                      | 77.0                    | 40.8                  | 39.6            | 89  |
| KF60M                                  | 97            | 32.8                        | 39.8                      | 67.2                    | 26.7                  | 25.9            | 91  |
| 3Fe:0.5Co/HZ                           | 97.5          | 27.0                        | 41.0                      | 73.0                    | 29.9                  | 29.2            | 89  |
| 3Fe:1Cu/HZ                             | 97.5          | 29.0                        | 40.0                      | 71.0                    | 28.4                  | 27.7            | 89  |
| 3Fe:1Cu:0.5Co/HZ, H <sub>2</sub> /CO=2 | 97.5          | 18.0                        | 44.0                      | 82.0                    | 36.1                  | 35.2            | 89  |
| 3Fe:1Cu:0.5Co/HZ, H <sub>2</sub> /CO=3 | 97.5          | 16.0                        | 30.0                      | 84.0                    | 25.2                  | 24.6            | 89  |
| KF40M                                  | 97.6          | 32.1                        | 36.2                      | 67.9                    | 24.6                  | 24.0            | 91  |
| KF20M                                  | 97.7          | 31.4                        | 34.4                      | 68.6                    | 23.6                  | 23.1            | 91  |
| 3Fe:1Co/HZ                             | 98            | 25.0                        | 38.0                      | 75.0                    | 28.5                  | 27.9            | 89  |
| 3Fe:1Cu:1Co/HZ                         | 98            | 24.0                        | 45.0                      | 76.0                    | 34.2                  | 33.5            | 89  |
| 3Fe:1Cu:0.5Co/HZ, 360°C                | 98            | 26.0                        | 40.0                      | 74.0                    | 29.6                  | 29.0            | 89  |
| 3Fe:1Cu:0.5Co/HZ, 5 Mpa                | 98            | 31.0                        | 37.0                      | 69.0                    | 25.5                  | 25.0            | 89  |
| 3Fe:1Cu:0.5Co/HZ, 350°C                | 98.5          | 23.0                        | 45.0                      | 77.0                    | 34.7                  | 34.1            | 89  |
| 0.2Cu-Fe/Z5                            | 99            | 41                          | 37.5                      | 59.0                    | 22.1                  | 21.9            | 92  |
| 0.7Cu-Fe/Z5                            | 99            | 41                          | 39                        | 59.0                    | 23.0                  | 22.8            | 92  |

**Table S8:** reported catalytic performance of bifunctional catalysts for the direct conversion of synthesis gas to aromatics by combining FTO catalysts and zeolites (continued)

| <b>catalyst</b> | <b>CO conversion</b> | <b>CO<sub>2</sub> selectivity</b> | <b>aromatics in hydrocarbons</b> | <b>hydrocarbon selectivity</b> | <b>aromatics selectivity</b> | <b>aromatics yield</b> | <b>ref</b> |
|-----------------|----------------------|-----------------------------------|----------------------------------|--------------------------------|------------------------------|------------------------|------------|
|                 | <b>%</b>             | <b>%<sub>c</sub></b>              | <b>%<sub>c</sub></b>             | <b>%<sub>c</sub></b>           | <b>%<sub>c</sub></b>         | <b>%<sub>c</sub></b>   |            |
| 1.5Cu-Fe/Z5     | 99                   | 39                                | 43                               | 61.0                           | 26.2                         | 26.0                   | 92         |

**Table S9:** combined reported catalytic performance of catalysts for the conversion of synthesis gas to aromatics via a dual reactor process

| <b>catalyst</b>                       | <b>CO conversion</b> | <b>CO<sub>2</sub> selectivity</b> | <b>methanol selectivity</b> | <b>aromatics selectivity from methanol</b> | <b>aromatics selectivity from synthesis gas</b> | <b>yield</b>         | <b>ref</b> |
|---------------------------------------|----------------------|-----------------------------------|-----------------------------|--------------------------------------------|-------------------------------------------------|----------------------|------------|
|                                       | <b>%</b>             | <b>%<sub>C</sub></b>              | <b>%<sub>C</sub></b>        | <b>%<sub>C</sub></b>                       | <b>%<sub>C</sub></b>                            | <b>%<sub>C</sub></b> |            |
| <b>dual reactor process</b>           |                      |                                   |                             |                                            |                                                 |                      |            |
| <b>MeOH</b>                           |                      |                                   |                             |                                            |                                                 |                      |            |
| Cu/ZnO/Al <sub>2</sub> O <sub>3</sub> | 8.6                  |                                   |                             | 97.7                                       |                                                 | 8.4                  | 30         |
| 2Cu_MCF 10.7                          | 10.7                 |                                   |                             | 97.0                                       |                                                 | 10.4                 | 31         |
| Cu/ZnO/Al <sub>2</sub> O <sub>3</sub> | 29.9                 |                                   |                             | 99.6                                       |                                                 | 29.8                 | 30         |
| Cu/ZnO/Al <sub>2</sub> O <sub>3</sub> | 34.4                 |                                   |                             | 99.8                                       |                                                 | 34.3                 | 30         |
| Cu/ZnO/Al <sub>2</sub> O <sub>3</sub> | 40.3                 |                                   |                             | 98.7                                       |                                                 | 39.8                 | 30         |
| Cu/ZnO/Al <sub>2</sub> O <sub>3</sub> | 47.0                 |                                   |                             | 98.9                                       |                                                 | 46.5                 | 30         |
| <b>MeOH + MTA</b>                     |                      |                                   |                             |                                            |                                                 |                      |            |
| H-ZSM-5                               | 8.6                  | 0.0                               | 33.0                        | 33.0                                       | 32.2                                            | 2.8                  | 93         |
| 8% Ga/ZSM-5                           | 8.6                  | 0.0                               | 50.0                        | 50.0                                       | 48.9                                            | 4.2                  | 94         |
| Gd-ZSM-5                              | 8.6                  | 0.0                               | 35.0                        | 35.0                                       | 34.2                                            | 2.9                  | 95         |
| Zn-ZSM-5                              | 8.6                  | 0.0                               | 46.0                        | 46.0                                       | 44.9                                            | 3.9                  | 96         |
| Zn-ZSM-5                              | 8.6                  | 0.0                               | 41.0                        | 41.0                                       | 40.1                                            | 3.4                  | 96         |
| H-ZSM-5                               | 10.7                 | 0.0                               | 33.0                        | 33.0                                       | 32.0                                            | 3.4                  | 93         |
| 8% Ga/ZSM-5                           | 10.7                 |                                   | 50.0                        | 50.0                                       | 48.5                                            | 5.2                  | 94         |
| Gd-ZSM-5                              | 10.7                 | 0.0                               | 35.0                        | 35.0                                       | 34.0                                            | 3.6                  | 95         |
| Zn-ZSM-5                              | 10.7                 | 0.0                               | 46.0                        | 46.0                                       | 44.6                                            | 4.8                  | 96         |
| Zn-ZSM-5                              | 10.7                 | 0.0                               | 41.0                        | 41.0                                       | 39.8                                            | 4.3                  | 96         |
| H-ZSM-5                               | 29.9                 | 0.0                               | 33.0                        | 33.0                                       | 32.9                                            | 9.8                  | 93         |
| 8% Ga/ZSM-5                           | 29.9                 | 0.0                               | 50.0                        | 50.0                                       | 49.8                                            | 14.9                 | 94         |
| Gd-ZSM-5                              | 29.9                 | 0.0                               | 35.0                        | 35.0                                       | 34.9                                            | 10.4                 | 95         |
| Zn-ZSM-5                              | 29.9                 | 0.0                               | 46.0                        | 46.0                                       | 45.8                                            | 13.7                 | 96         |
| Zn-ZSM-5                              | 29.9                 | 0.0                               | 41.0                        | 41.0                                       | 40.8                                            | 12.2                 | 96         |
| H-ZSM-5                               | 34.4                 | 0.0                               | 33.0                        | 33.0                                       | 32.9                                            | 11.3                 | 93         |
| 8% Ga/ZSM-5                           | 34.4                 | 0.0                               | 50.0                        | 50.0                                       | 49.9                                            | 17.2                 | 94         |
| Gd-ZSM-5                              | 34.4                 | 0.0                               | 35.0                        | 35.0                                       | 34.9                                            | 12.0                 | 95         |
| Zn-ZSM-5                              | 34.4                 | 0.0                               | 46.0                        | 46.0                                       | 45.9                                            | 15.8                 | 96         |
| Zn-ZSM-5                              | 34.4                 | 0.0                               | 41.0                        | 41.0                                       | 40.9                                            | 14.1                 | 96         |
| H-ZSM-5                               | 40.3                 | 0.0                               | 33.0                        | 33.0                                       | 32.6                                            | 13.1                 | 93         |
| 8% Ga/ZSM-5                           | 40.3                 | 0.0                               | 50.0                        | 50.0                                       | 49.4                                            | 19.9                 | 94         |
| Gd-ZSM-5                              | 40.3                 | 0.0                               | 35.0                        | 35.0                                       | 34.5                                            | 13.9                 | 95         |
| Zn-ZSM-5                              | 40.3                 | 0.0                               | 46.0                        | 46.0                                       | 45.4                                            | 18.3                 | 96         |
| Zn-ZSM-5                              | 40.3                 | 0.0                               | 41.0                        | 41.0                                       | 40.5                                            | 16.3                 | 96         |
| H-ZSM-5                               | 47.0                 | 0.0                               | 33.0                        | 33.0                                       | 32.6                                            | 15.3                 | 93         |

**Table S9:** combined reported catalytic performance of catalysts for the conversion of synthesis gas to aromatics via a dual reactor process (continued)

| catalyst                       | CO conversion | CO <sub>2</sub> selectivity | methanol selectivity | aromatics selectivity from methanol | aromatics selectivity from synthesis gas | yield          | ref |
|--------------------------------|---------------|-----------------------------|----------------------|-------------------------------------|------------------------------------------|----------------|-----|
|                                | %             | % <sub>c</sub>              | % <sub>c</sub>       | % <sub>c</sub>                      | % <sub>c</sub>                           | % <sub>c</sub> |     |
| 8% Ga/ZSM-5                    | 47.0          | 0.0                         | 50.0                 | 50.0                                | 49.5                                     | 23.2           | 94  |
| Gd-ZSM-5                       | 47.0          | 0.0                         | 35.0                 | 35.0                                | 34.6                                     | 16.3           | 95  |
| Zn-ZSM-5                       | 47.0          | 0.0                         | 46.0                 | 46.0                                | 45.5                                     | 21.4           | 96  |
| Zn-ZSM-5                       | 47.0          | 0.0                         | 41.0                 | 41.0                                | 40.5                                     | 19.1           | 96  |
| <b>MTA via dehydrogenation</b> |               |                             |                      |                                     |                                          |                |     |
| Zn/ZSM-5                       | 8.6           |                             | 95.8                 | 95.8                                | 93.6                                     | 8.1            | 97  |
| Zn/ZSM-5                       | 10.7          |                             | 95.8                 | 95.8                                | 92.9                                     | 9.9            | 97  |
| Zn/ZSM-5                       | 29.9          |                             | 95.8                 | 95.8                                | 95.4                                     | 28.5           | 97  |
| Zn/ZSM-5                       | 34.4          |                             | 95.8                 | 95.8                                | 95.6                                     | 32.9           | 97  |
| Zn/ZSM-5                       | 40.3          |                             | 95.8                 | 95.8                                | 94.6                                     | 38.1           | 97  |
| Zn/ZSM-5                       | 47.0          |                             | 95.8                 | 95.8                                | 94.8                                     | 44.5           | 97  |



## 4. Gasoline

We analyzed recent publications of bifunctional catalysis to convert synthesis gas directly to gasoline. Beside the overall selectivity of the bifunctional process, we also focused on the resulting octane number of the C<sub>5</sub>-C<sub>11</sub> products.

### 4.1. Octane number

The octane number of the C<sub>5</sub>-C<sub>11</sub> products was estimated by using the blending research octane number (BRON) of the single components. The BRON can describe the effect of a single component being blended into a base gasoline fuel, whereas the pure research octane number (RON) of a component is measured as pure compound<sup>98</sup>. The BRON of the C<sub>5</sub>-C<sub>11</sub> paraffins, iso-paraffins, olefins, iso-olefins and aromatics were either found in literature<sup>98-100</sup> or estimated by extrapolation.

The average C<sub>5</sub>-C<sub>11</sub> paraffins BRON can be found in Table S10 and Figure S1. The individual BRON of all isomers were averaged for every carbon number with the same number of branches. Analog, the average BRON for olefins were determined (Table S11 and Figure S2). However, the olefins were not further divided by the position of the double bond, despite the effect of the double bond position on the BRON (Figure S3). The BRON of C<sub>6</sub>-C<sub>11</sub> aromatics was averaged over the corresponding carbon numbers (Table S12, Figure S4 and Figure S5).

**Table S10:** average blending research octane numbers of C<sub>5</sub>-C<sub>11</sub> paraffins divided into number of branches.

|                 | number of branches |                  |                 |                 |                 |                  |
|-----------------|--------------------|------------------|-----------------|-----------------|-----------------|------------------|
|                 | 0                  | 1                | 2               | 3               | 4               | 5                |
| C <sub>5</sub>  | 62                 | 99               | 100             |                 |                 |                  |
| C <sub>6</sub>  | 19                 | 85               | 93              |                 |                 |                  |
| C <sub>7</sub>  | 0                  | 54               | 84              | 113             |                 |                  |
| C <sub>8</sub>  | -19                | 31               | 69              | 101             | 120             |                  |
| C <sub>9</sub>  | -30                | 20 <sup>1</sup>  | 56 <sup>1</sup> | 92              | 121             |                  |
| C <sub>10</sub> | -41                | 2                | 34              | 70 <sup>1</sup> | 111             |                  |
| C <sub>11</sub> | -48 <sup>1</sup>   | -12 <sup>1</sup> | 18 <sup>1</sup> | 55 <sup>1</sup> | 98 <sup>1</sup> | 130 <sup>1</sup> |

<sup>1</sup>: extrapolated

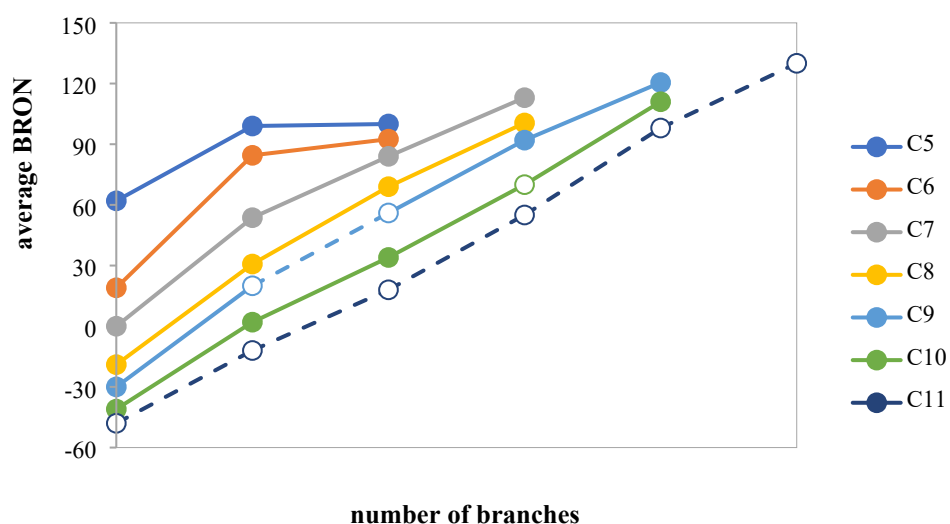

**Figure S1:** average blending research octane number of C<sub>5</sub>-C<sub>11</sub> paraffins as function of number of branching.

**Table S11:** average blending research octane numbers of C<sub>5</sub>-C<sub>11</sub> olefins divided into number of branches.

|                 | number of branches |                 |                 |                  |                  |                 |
|-----------------|--------------------|-----------------|-----------------|------------------|------------------|-----------------|
|                 | 0                  | 1               | 2               | 3                | 4                | 5               |
| C <sub>5</sub>  | 112                | 125             | 127             |                  |                  |                 |
| C <sub>6</sub>  | 100                | 112             | 120             |                  |                  |                 |
| C <sub>7</sub>  | 75                 | 86              | 98              | 110 <sup>1</sup> |                  |                 |
| C <sub>8</sub>  | 61                 | 72 <sup>1</sup> | 85 <sup>1</sup> | 100 <sup>1</sup> | 115 <sup>1</sup> |                 |
| C <sub>9</sub>  | 48                 | 60 <sup>1</sup> | 72 <sup>1</sup> | 87 <sup>1</sup>  | 102 <sup>1</sup> |                 |
| C <sub>10</sub> | 35                 | 47 <sup>1</sup> | 59 <sup>1</sup> | 75 <sup>1</sup>  | 90 <sup>1</sup>  |                 |
| C <sub>11</sub> | 20 <sup>1</sup>    | 32 <sup>1</sup> | 46 <sup>1</sup> | 63 <sup>1</sup>  | 78 <sup>1</sup>  | 90 <sup>1</sup> |

<sup>1</sup>: extrapolated

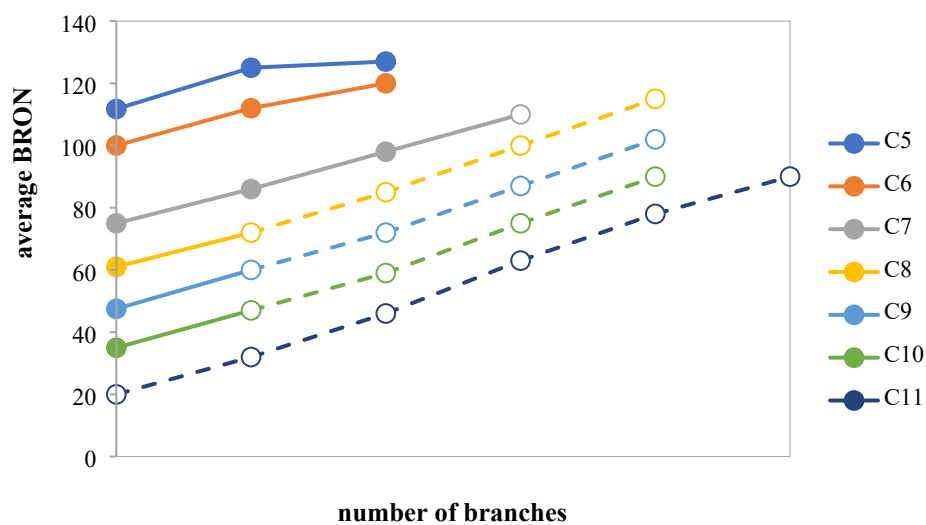

**Figure S2:** average blending research octane number of C<sub>5</sub>-C<sub>11</sub> olefins as function of number of branching.

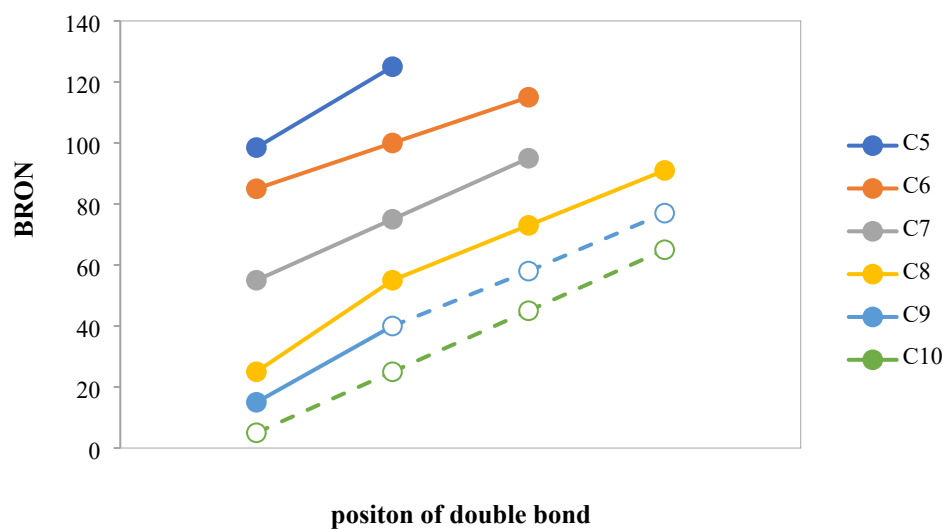

**Figure S3:** blending research octane number of linear C<sub>5</sub>-C<sub>10</sub> olefins as function of double bond position.

**Table S12:** average blending research octane numbers of C<sub>6</sub>-C<sub>11</sub> aromatics divided into number of side chains.

|                 | side chains |       |                  |                  |                  | average |
|-----------------|-------------|-------|------------------|------------------|------------------|---------|
|                 | 0           | 1     | 2                | 3                | 4                |         |
| C <sub>6</sub>  | 108         |       |                  |                  |                  | 108     |
| C <sub>7</sub>  |             | 120   |                  |                  |                  | 120     |
| C <sub>8</sub>  |             | 120.9 | 131.5            |                  |                  | 126     |
| C <sub>9</sub>  |             | 124.1 | 127 <sup>1</sup> | 131 <sup>1</sup> |                  | 127     |
| C <sub>10</sub> |             | 116.7 | 121.8            | 126.9            | 133              | 125     |
| C <sub>11</sub> |             | 101   | 112.7            | 120 <sup>1</sup> | 125 <sup>1</sup> | 117     |

<sup>1</sup>: extrapolated

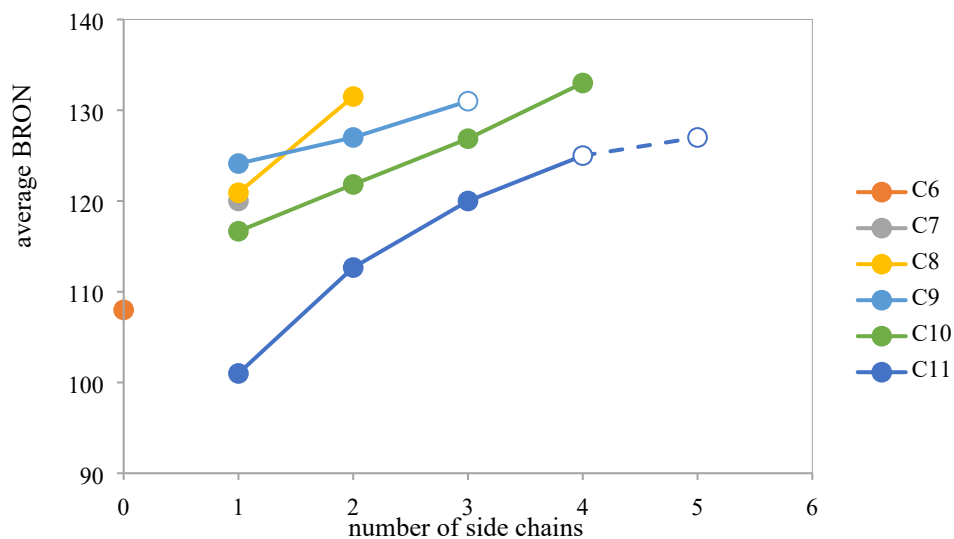

**Figure S4:** average blending research octane number of C<sub>6</sub>-C<sub>11</sub> aromatics as function of number of side chains.

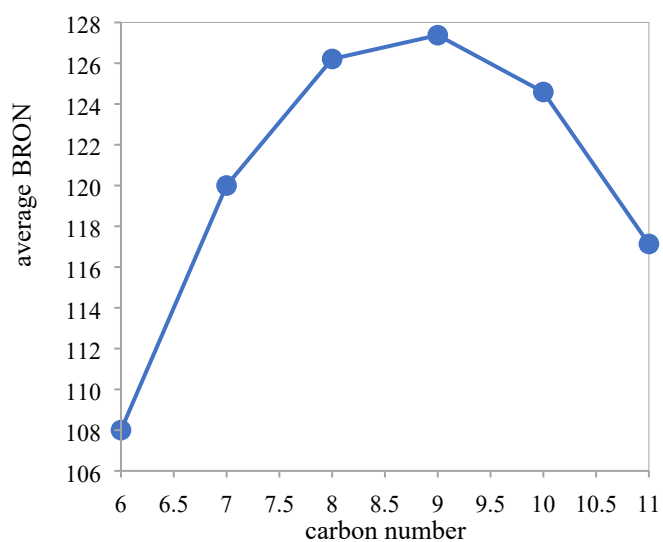

**Figure S5:** average blending research octane number of aromatics as function of carbon number.

## 4.2. Analysis of published literature

The overall selectivity of the conversion of synthesis gas to gasoline was analyzed analog to the selectivity of C<sub>2</sub>-C<sub>4</sub> olefins (Equation 10 and Equation 11). Here, paraffins, olefins (both including isomers) and aromatics in the range of C<sub>5</sub>-C<sub>11</sub> were considered.

$$Y(\text{gasoline}) = \frac{n_{out}(C_{\text{gasoline}})}{n_{in}(CO_x)} \quad \text{Equation 10}$$

$$S(\text{gasoline}) = \frac{Y(\text{gasoline})}{X(CO_x)} \quad \text{Equation 11}$$

Where,

*Y*: yield

*n<sub>out</sub>*: molar flow at reactor outlet

*n<sub>in</sub>*: molar flow at reactor inlet

*C<sub>gasoline</sub>*: carbon atoms in the C<sub>5</sub> – C<sub>11</sub> fraction

*S*: selectivity

*X*: conversion

To estimate the octane number of the C<sub>5</sub>-C<sub>11</sub> products the reported selectivities of C<sub>5</sub>-C<sub>11</sub> paraffins, iso-paraffins, olefins, iso-olefins and aromatics were normalized. Isomers (if not reported in detail) were further divided by the number of branches according to the thermodynamic equilibrium at the corresponding reaction temperature. If the fraction of isomers was not reported for paraffins or olefins, the linear components were considered as well (Table S13). The individual concentrations of paraffins, iso-paraffins, olefins, iso-olefins and aromatics were multiplied with the corresponding BON (Table S10 - Table S12) and added up, resulting in the overall octane number of the C<sub>5</sub>-C<sub>11</sub> products. If the concentration of olefins exceeded the allowed amount of 18%, we reduced the concentration of olefins in favor of additional paraffins. Also, when *iso*-paraffins and olefins were reported as a single group we divided the corresponding concentration to olefins and *iso*-paraffins accordingly.

We analyzed recent publications with the following approaches to convert synthesis gas to gasoline: combination of Co-based FT catalysts with zeolite, whereas we distinguished between 12-membered ring (Table S14) and 10-membered ring zeolites (Table S15) and non-micro-porous solid acids (NMPA, Table S16). The combination of iron-based FT catalysts and zeolites (Table S17), the OX-ZEO process (Table S18) were analyzed. Additionally, dual bed configurations with dedicated temperatures for the individual catalyst beds were investigated (Table S19). Finally, the dual reactor approach shows the combination of methanol synthesis with consecutive methanol-to-gasoline (MTG) reaction in separate processes was added as a comparison (Table 20).

These calculations of the octane number of the C<sub>5</sub>-C<sub>11</sub> products are theoretical and based on several assumptions, estimations, and simplifications. To determine the real RON, the mixture of condensed products must be analyzed using validated methods, such as ASTM D2699, GB/T 5487. However, this estimation can give a good indication of the real RON of the corresponding products.



**Table S14:** reported catalytic performance of bifunctional catalysts for the direct conversion of synthesis gas to gasoline by combining Co-based FT catalysts and 12-membered ring zeolites

| catalyst    | zeolite | temperature | pressure | CO conversion | CO <sub>2</sub> selectivity | hydrocarbon distribution |                                 |                                       | C <sub>5</sub> -C <sub>11</sub> |                |                |               | ref |
|-------------|---------|-------------|----------|---------------|-----------------------------|--------------------------|---------------------------------|---------------------------------------|---------------------------------|----------------|----------------|---------------|-----|
|             |         |             |          |               |                             | CH <sub>4</sub>          | C <sub>5</sub> -C <sub>11</sub> | C <sub>5</sub> -C <sub>11</sub> yield | lin paraffins                   | iso-paraffins  | olefins        | octane number |     |
|             |         | °C          | bar(g)   | %             | % <sub>c</sub>              | % <sub>c</sub>           | % <sub>c</sub>                  | % <sub>c</sub>                        | % <sub>c</sub>                  | % <sub>c</sub> | % <sub>c</sub> |               |     |
| Co/USY-S    | USY     | 260         | 10       | 50            | 0                           | 28                       | 39.4                            | 19.7                                  | 29.6                            | 41.5           | 28.9           | 64.7          | 101 |
|             |         |             |          |               |                             |                          |                                 |                                       | 34.1                            | 47.9           | 18             | 60.0          |     |
|             |         |             |          |               |                             |                          |                                 |                                       | 41.6                            | 58.4           | 0              | 52.3          |     |
| Co/Y-Ce     | Y       | 250         | 20       | 34            | 2                           | 11                       | 73.5                            | 24.5                                  | 28.6                            | 71.4           | 0              | 29.3          | 102 |
|             |         |             |          |               |                             |                          |                                 |                                       | 28.6                            | 53.4           | 18             | 34.4          |     |
|             |         |             |          |               |                             |                          |                                 |                                       | 28.6                            | 0              | 71.4           | 49.6          |     |
| Co/Y-La     | Y       | 250         | 20       | 40            | 2                           | 9.5                      | 54.5                            | 21.4                                  | 26.6                            | 73.4           | 0              | 19.6          | 102 |
|             |         |             |          |               |                             |                          |                                 |                                       | 26.6                            | 55.4           | 18             | 25.2          |     |
|             |         |             |          |               |                             |                          |                                 |                                       | 26.6                            | 0              | 73.4           | 42.3          |     |
| Co/Y-P      | Y       | 260         | 10       | 50.2          | 1.1                         | 21.9                     | 59.4                            | 29.5                                  | 27                              | 44             | 29             | 44.2          | 103 |
|             |         |             |          |               |                             |                          |                                 |                                       | 31.2                            | 50.8           | 18             | 35.6          |     |
|             |         |             |          |               |                             |                          |                                 |                                       | 38                              | 62             | 0              | 21.4          |     |
| Co/Y-A      | Y       | 260         | 10       | 66.2          | 1.5                         | 10.8                     | 69.5                            | 45.3                                  | 28.5                            | 64.1           | 7.4            | 48.2          | 103 |
|             |         |             |          |               |                             |                          |                                 |                                       | 29.7                            | 66.8           | 3.5            | 46.7          |     |
|             |         |             |          |               |                             |                          |                                 |                                       | 30.8                            | 69.2           | 0              | 43.1          |     |
| Co/Y-B      | Y       | 260         | 10       | 69.7          | 2.9                         | 11.9                     | 65.3                            | 44.2                                  | 31                              | 56.9           | 12.1           | 49.8          | 103 |
|             |         |             |          |               |                             |                          |                                 |                                       | 33.1                            | 60.9           | 6              | 47.4          |     |
|             |         |             |          |               |                             |                          |                                 |                                       | 35.2                            | 64.8           | 0              | 41.8          |     |
| Co/Y-AB0.25 | Y       | 260         | 10       | 66.3          | 1.9                         | 14.7                     | 67.3                            | 43.8                                  | 26.9                            | 46.4           | 26.7           | 47.1          | 103 |
|             |         |             |          |               |                             |                          |                                 |                                       | 30.1                            | 51.9           | 18             | 40.4          |     |
|             |         |             |          |               |                             |                          |                                 |                                       | 36.7                            | 63.3           | 0              | 30.6          |     |
| Co/Y-AB1    | Y       | 260         | 10       | 75.7          | 3.5                         | 11.4                     | 66.8                            | 48.8                                  | 24.9                            | 51.3           | 23.8           | 44.9          | 103 |
|             |         |             |          |               |                             |                          |                                 |                                       | 26.8                            | 55.2           | 18             | 37.6          |     |
|             |         |             |          |               |                             |                          |                                 |                                       | 32.7                            | 67.3           | 0              | 28.0          |     |
| Co/Y-AB4    | Y       | 260         | 10       | 75.9          | 1.8                         | 8.4                      | 71.5                            | 53.3                                  | 15                              | 61.2           | 23.8           | 49.7          | 103 |
|             |         |             |          |               |                             |                          |                                 |                                       | 16.1                            | 65.9           | 18             | 42.7          |     |
|             |         |             |          |               |                             |                          |                                 |                                       | 19.7                            | 80.3           | 0              | 34.1          |     |
| Co/Y-AB6    | Y       | 260         | 10       | 66.5          | 2                           | 14.5                     | 64.3                            | 41.9                                  | 28.3                            | 54.5           | 17.1           | 44.1          | 103 |
|             |         |             |          |               |                             |                          |                                 |                                       | 31.2                            | 60.2           | 8.6            | 40.0          |     |
|             |         |             |          |               |                             |                          |                                 |                                       | 34.2                            | 65.8           | 0              | 31.6          |     |
| Co/MOR      | MOR     | 250         | 20       | 39.7          | 0.6                         | 9.2                      | 18.1                            | 7.1                                   | 61                              | 29.3           | 9.7            | 22.6          | 104 |
|             |         |             |          |               |                             |                          |                                 |                                       | 64.2                            | 30.9           | 4.9            | 19.1          |     |
|             |         |             |          |               |                             |                          |                                 |                                       | 67.5                            | 32.5           | 0              | 15.6          |     |
| Co/BEA      | BEA     | 250         | 20       | 17.5          | 0.7                         | 10.5                     | 18.7                            | 3.2                                   | 56                              | 37.5           | 6.5            | 27.4          | 104 |

**Table S14:** reported catalytic performance of bifunctional catalysts for the direct conversion of synthesis gas to gasoline by combining Co-based FT catalysts and 12-membered ring zeolites (continued)

| catalyst | zeolite | temperature | pressure | CO conversion | CO <sub>2</sub> selectivity | hydrocarbon distribution |                                 |                                       | C <sub>5</sub> -C <sub>11</sub> |                |                |               | ref |
|----------|---------|-------------|----------|---------------|-----------------------------|--------------------------|---------------------------------|---------------------------------------|---------------------------------|----------------|----------------|---------------|-----|
|          |         |             |          |               |                             | CH <sub>4</sub>          | C <sub>5</sub> -C <sub>11</sub> | C <sub>5</sub> -C <sub>11</sub> yield | lin paraffins                   | iso-paraffins  | olefins        | octane number |     |
|          |         | °C          | bar(g)   | %             | % <sub>c</sub>              | % <sub>c</sub>           | % <sub>c</sub>                  | % <sub>c</sub>                        | % <sub>c</sub>                  | % <sub>c</sub> | % <sub>c</sub> |               |     |
|          |         |             |          |               |                             |                          |                                 | 57.9                                  | 38.8                            | 3.3            | 25.1           |               |     |
|          |         |             |          |               |                             |                          |                                 | 59.9                                  | 40.1                            | 0              | 22.7           |               |     |

**Table S15:** reported catalytic performance of bifunctional catalysts for the direct conversion of synthesis gas to gasoline by combining Co-based FT catalysts and 10-membered ring zeolites

| catalyst          | zeolite   | temperature | pressure | CO conversion | CO2 selectivity | hydrocarbon distribution |                |                | C5-C11                    |                           |                |                | ref |
|-------------------|-----------|-------------|----------|---------------|-----------------|--------------------------|----------------|----------------|---------------------------|---------------------------|----------------|----------------|-----|
|                   |           |             |          |               |                 | CH4                      | C5-C11         | C5-C11 yield   | lin paraffins             | iso-paraffins             | olefins        | octane number  |     |
|                   |           |             |          |               |                 | % <sub>c</sub>           | % <sub>c</sub> | % <sub>c</sub> | % <sub>c</sub>            | % <sub>c</sub>            | % <sub>c</sub> | % <sub>c</sub> |     |
|                   |           | °C          | bar(g)   | %             | % <sub>c</sub>  |                          |                |                |                           |                           |                |                |     |
| Z/Co/SiO2         | ZSM5      | 260         | 10       | 83            | 4               | 21                       | 39.7           | 31.7           | 70.6                      | 29.4                      | 0              | 28.8           | 105 |
|                   |           |             |          |               |                 |                          |                |                | 70.6                      | 11.4                      | 18             | 33.5           |     |
|                   |           |             |          |               |                 |                          |                |                | 70.6                      | 0                         | 29.4           | 36.5           |     |
| Co/SiO2+ZSM5      | ZSM5      | 260         | 10       | 82            | 15              | 13.5                     | 40.4           | 28.2           | 55.3                      | 44.7                      | 0              | 30.3           | 105 |
|                   |           |             |          |               |                 |                          |                |                | 55.3                      | 26.7                      | 18             | 35.1           |     |
|                   |           |             |          |               |                 |                          |                |                | 55.3                      | 0                         | 44.7           | 42.2           |     |
| Z/Co/SiO2-crushed | ZSM5      | 260         | 10.0     | 81            | 7               | 19.5                     | 42.1           | 31.7           | 66.1                      | 33.9                      | 0              | 31.5           | 105 |
|                   |           |             |          |               |                 |                          |                |                | 66.1                      | 15.9                      | 18             | 36.2           |     |
|                   |           |             |          |               |                 |                          |                |                | 66.1                      | 0                         | 33.9           | 40.4           |     |
| Z/Co/SiO2-no TEOS | ZSM5      | 260         | 10       | 90            | 12              | 21.5                     | 37.8           | 30.0           | 70.1                      | 29.9                      | 0              | 28.7           | 105 |
|                   |           |             |          |               |                 |                          |                |                | 70.1                      | 11.9                      | 18             | 33.5           |     |
|                   |           |             |          |               |                 |                          |                |                | 70.1                      | 0                         | 29.9           | 36.6           |     |
| Z/Co/SiO2         | ZSM5      | 260         | 10.0     | 34            | 9               | 11.5                     | 53.6           | 16.6           | 61.4                      | 38.6                      | 0              | 18.1           | 105 |
|                   |           |             |          |               |                 |                          |                |                | 61.4                      | 20.6                      | 18             | 22.9           |     |
|                   |           |             |          |               |                 |                          |                |                | 61.4                      | 0                         | 38.6           | 28.5           |     |
| Co/ZSM5           | ZSM5      | 240         | 15       | 31            | 1               | 19                       | 43.6           | 13.4           | 65.7                      | 34.3                      | 0              | 17.4           | 105 |
|                   |           |             |          |               |                 |                          |                |                | 65.7                      | 16.3                      | 18             | 22.3           |     |
|                   |           |             |          |               |                 |                          |                |                | 65.7                      | 0                         | 34.3           | 26.6           |     |
| Co/meso-ZSM5      | ZSM5      | 240         | 15.0     | 80            | 3               | 19                       | 46.6           | 36.2           | 47.3                      | 52.7                      | 0              | 28.1           | 105 |
|                   |           |             |          |               |                 |                          |                |                | 47.3                      | 34.7                      | 18             | 33.1           |     |
|                   |           |             |          |               |                 |                          |                |                | 47.3                      | 0                         | 52.7           | 43.0           |     |
| ZSM-5/Co-Al2O3/M  | ZSM5      | 230         | 12       | 78.7          |                 | 10.9                     | 89.0           | 70.0           | 25.7                      | 50.9                      | 23.3           | 38.2           | 106 |
|                   |           |             |          |               |                 |                          |                |                |                           |                           |                |                |     |
|                   |           |             |          |               |                 |                          |                |                | <i>in liquid products</i> | <i>in liquid products</i> | 27.5           | 54.5           |     |
| ZSM-5/Co-Al2O3/M  | ZSM5      | 250         | 12       | 78.9          |                 | 17.2                     | 91.4           | 72.1           | 26.1                      | 53                        | 20.8           | 36.5           | 106 |
|                   |           |             |          |               |                 |                          |                |                |                           |                           |                |                |     |
|                   |           |             |          |               |                 |                          |                |                | <i>in liquid products</i> | <i>in liquid products</i> | 27.1           | 54.9           |     |
| ZSM-5/Co-Al2O3/M  | ZSM5      | 230         | 6        | 81.6          |                 | 17.3                     | 92.1           | 75.2           | 24.6                      | 49.3                      | 26.1           | 40.5           | 106 |
|                   |           |             |          |               |                 |                          |                |                |                           |                           |                |                |     |
|                   |           |             |          |               |                 |                          |                |                | <i>in liquid products</i> | <i>in liquid products</i> | 27.3           | 54.7           |     |
| ZSM-5/Co-Al2O3/M  | ZSM5      | 230         | 20       | 63.2          |                 | 10.2                     | 72.9           | 46.1           | 28.8                      | 46.2                      | 25.1           | 28.5           | 106 |
|                   |           |             |          |               |                 |                          |                |                |                           |                           |                |                |     |
|                   |           |             |          |               |                 |                          |                |                | <i>in liquid products</i> | <i>in liquid products</i> | 31.5           | 50.5           |     |
| Co/MZ             | meso ZSM5 | 260         | 10       | 25.9          | 0               | 17.6                     | 65.5           | 17.0           | 38.4                      | 61.6                      | 0              | 12.2           | 107 |
|                   |           |             |          |               |                 |                          |                |                |                           |                           |                |                |     |
|                   |           |             |          |               |                 |                          |                |                |                           |                           |                |                |     |



**Table S15:** reported catalytic performance of bifunctional catalysts for the direct conversion of synthesis gas to gasoline by combining Co-based FT catalysts and 10-membered ring zeolites (continued)

| catalyst                                                  | zeolite | temperature<br>°C | pressure<br>bar(g) | CO conversion<br>% | CO2 selectivity<br>% <sub>c</sub> | hydrocarbon distribution |                          |                                | C5-C11                          |                                 |                           |               | ref |
|-----------------------------------------------------------|---------|-------------------|--------------------|--------------------|-----------------------------------|--------------------------|--------------------------|--------------------------------|---------------------------------|---------------------------------|---------------------------|---------------|-----|
|                                                           |         |                   |                    |                    |                                   | CH4<br>% <sub>c</sub>    | C5-C11<br>% <sub>c</sub> | C5-C11 yield<br>% <sub>c</sub> | lin paraffins<br>% <sub>c</sub> | iso-paraffins<br>% <sub>c</sub> | olefins<br>% <sub>c</sub> | octane number |     |
|                                                           |         |                   |                    |                    |                                   |                          |                          |                                |                                 |                                 |                           |               |     |
| Co/Z                                                      | ZSM5    | 250               | 20                 | 22                 | 0.99                              | 29.9                     | 44.3                     | 9.7                            | 26.8                            | 55.2                            | 18                        | 48.0          | 108 |
|                                                           |         |                   |                    |                    |                                   |                          |                          |                                | 32.7                            | 67.3                            | 0                         | 36.8          |     |
|                                                           |         |                   |                    |                    |                                   |                          |                          |                                | 22.2                            | 77.8                            | 0                         | 53.7          |     |
| Co/M-4Z                                                   | ZSM5    | 250               | 20                 | 6.9                | 1.08                              | 26.5                     | 44.8                     | 3.1                            | 22.2                            | 59.8                            | 18                        | 58.4          | 108 |
|                                                           |         |                   |                    |                    |                                   |                          |                          |                                | 22.2                            | 0                               | 77.8                      | 74.1          |     |
|                                                           |         |                   |                    |                    |                                   |                          |                          |                                | 20.7                            | 79.3                            | 0                         | 67.8          |     |
| Co/M-Z                                                    | ZSM5    | 250               | 20                 | 22.2               | 0.96                              | 18.7                     | 54.0                     | 11.9                           | 20.7                            | 61.3                            | 18                        | 72.4          | 108 |
|                                                           |         |                   |                    |                    |                                   |                          |                          |                                | 20.7                            | 0                               | 79.3                      | 87.9          |     |
|                                                           |         |                   |                    |                    |                                   |                          |                          |                                | 37.1                            | 62.9                            | 0                         | 35.4          |     |
| 4Co/M-Z                                                   | ZSM5    | 250               | 20                 | 40.2               | 0.63                              | 15.6                     | 40.1                     | 16.0                           | 37.1                            | 44.9                            | 18                        | 40.5          | 108 |
|                                                           |         |                   |                    |                    |                                   |                          |                          |                                | 37.1                            | 0                               | 62.9                      | 53.2          |     |
|                                                           |         |                   |                    |                    |                                   |                          |                          |                                | 56.5                            | 43.5                            | 0                         | 16.8          |     |
| Co-4.5/Z5                                                 | ZSM5    | 240               | 20                 | 18                 | 0                                 | 28.3                     | 41.9                     | 7.5                            | 56.5                            | 25.5                            | 18                        | 22.1          | 109 |
|                                                           |         |                   |                    |                    |                                   |                          |                          |                                | 56.5                            | 0                               | 43.5                      | 29.7          |     |
|                                                           |         |                   |                    |                    |                                   |                          |                          |                                | 52.5                            | 18.1                            | 29.4                      | 40.9          |     |
| Co-9.9/Z5                                                 | ZSM5    | 240               | 20                 | 59                 | 0                                 | 21.9                     | 44.4                     | 26.2                           | 61                              | 21                              | 18                        | 31.8          | 109 |
|                                                           |         |                   |                    |                    |                                   |                          |                          |                                | 74.4                            | 25.6                            | 0                         | 17.3          |     |
|                                                           |         |                   |                    |                    |                                   |                          |                          |                                | 69.9                            | 15                              | 15                        | 19.2          |     |
| Co-14/Z5                                                  | ZSM5    | 240               | 20                 | 58                 | 0                                 | 20.9                     | 45.1                     | 26.1                           | 76.1                            | 16.4                            | 7.5                       | 14.5          | 109 |
|                                                           |         |                   |                    |                    |                                   |                          |                          |                                | 82.3                            | 17.7                            | 0                         | 9.8           |     |
|                                                           |         |                   |                    |                    |                                   |                          |                          |                                | 72.9                            | 11.3                            | 15.8                      | 8.4           |     |
| Co-18/Z5                                                  | ZSM5    | 240               | 20                 | 50                 | 0                                 | 21                       | 40.3                     | 20.1                           | 79.8                            | 12.4                            | 7.9                       | 3.4           | 109 |
|                                                           |         |                   |                    |                    |                                   |                          |                          |                                | 86.6                            | 13.4                            | 0                         | -1.6          |     |
|                                                           |         |                   |                    |                    |                                   |                          |                          |                                | 73.2                            | 11.8                            | 15                        | 9.8           |     |
| Co/ZSM-5                                                  | ZSM5    | 250               | 20                 | 26.8               | 0.5                               | 11.7                     | 23.9                     | 6.4                            | 79.7                            | 12.8                            | 7.5                       | 4.8           | 104 |
|                                                           |         |                   |                    |                    |                                   |                          |                          |                                | 86.2                            | 13.8                            | 0                         | -0.2          |     |
|                                                           |         |                   |                    |                    |                                   |                          |                          |                                | 20                              | 56.7                            | 23.2                      | 50.2          |     |
| Co-SiO <sub>2</sub> /ZSM-5/Al <sub>2</sub> O <sub>3</sub> | ZSM5    | 250               | 10                 | 75.2               | 2.2                               | 15.6                     | 39.9                     | 29.3                           | 21.4                            | 60.6                            | 18                        | 47.6          | 110 |
|                                                           |         |                   |                    |                    |                                   |                          |                          |                                | 26.1                            | 73.9                            | 0                         | 38.6          |     |
|                                                           |         |                   |                    |                    |                                   |                          |                          |                                | 18.3                            | 22.5                            | 59.2                      | 51.7          |     |
|                                                           |         |                   |                    |                    |                                   |                          |                          |                                | 36.8                            | 45.2                            | 18                        | 27.7          |     |
|                                                           |         |                   |                    |                    |                                   |                          |                          |                                | 44.9                            | 55.1                            | 0                         | 17.3          |     |

**Table S16:** reported catalytic performance of bifunctional catalysts for the direct conversion of synthesis gas to gasoline by combining Co-based FT catalysts and non-microporous solid acids

| catalyst    | zeolite | temperature | pressure | CO conversion | CO <sub>2</sub> selectivity | hydrocarbon distribution |                                 |                                       | C <sub>5</sub> -C <sub>11</sub> |                |                |               | ref |
|-------------|---------|-------------|----------|---------------|-----------------------------|--------------------------|---------------------------------|---------------------------------------|---------------------------------|----------------|----------------|---------------|-----|
|             |         |             |          |               |                             | CH <sub>4</sub>          | C <sub>5</sub> -C <sub>11</sub> | C <sub>5</sub> -C <sub>11</sub> yield | lin paraffins                   | iso-paraffins  | olefins        | octane number |     |
|             |         | °C          | bar(g)   | %             | % <sub>c</sub>              | % <sub>c</sub>           | % <sub>c</sub>                  | % <sub>c</sub>                        | % <sub>c</sub>                  | % <sub>c</sub> | % <sub>c</sub> |               |     |
| Co/SBA15    | SBA15   | 260         | 10       | 81.7          | 2.4                         | 7.1                      | 54.2                            | 43.3                                  | 64.9                            | 7.9            | 27.2           | 22.2          | 107 |
|             |         |             |          |               |                             |                          |                                 |                                       | 73.1                            | 8.9            | 18             | 13.1          |     |
|             |         |             |          |               |                             |                          |                                 |                                       | 89.2                            | 10.8           | 0              | -4.6          |     |
| Co/Al-SBA15 | SBA15   | 260         | 10       | 64.2          | 0.9                         | 10.7                     | 62.8                            | 40.0                                  | 37.9                            | 21.7           | 40.5           | 50.1          | 107 |
|             |         |             |          |               |                             |                          |                                 |                                       | 52.2                            | 29.8           | 18             | 31.9          |     |
|             |         |             |          |               |                             |                          |                                 |                                       | 63.6                            | 36.4           | 0              | 17.3          |     |

**Table S17:** reported catalytic performance of bifunctional catalysts for the direct conversion of synthesis gas to gasoline by combining Fe-based FT catalysts and zeolites

| catalyst                 | zeolite | temperature | pressure | CO conversion | CO <sub>2</sub> selectivity | hydrocarbon distribution |                                 |                                       | C <sub>5</sub> -C <sub>11</sub> |                |                |                |                | ref |
|--------------------------|---------|-------------|----------|---------------|-----------------------------|--------------------------|---------------------------------|---------------------------------------|---------------------------------|----------------|----------------|----------------|----------------|-----|
|                          |         |             |          |               |                             | CH <sub>4</sub>          | C <sub>5</sub> -C <sub>11</sub> | C <sub>5</sub> -C <sub>11</sub> yield | lin paraffins                   | iso-paraffins  | olefins        | aromatics      | octane number  |     |
|                          |         |             |          |               |                             | % <sub>c</sub>           | % <sub>c</sub>                  | % <sub>c</sub>                        | % <sub>c</sub>                  | % <sub>c</sub> | % <sub>c</sub> | % <sub>c</sub> | % <sub>c</sub> |     |
| CMA/Hol-Z5-N@S1          | H-ZSM-5 | 280         | 20       | 57.3          | 40.6                        | 2.8                      | 23.9                            | 8.1                                   | 8.0                             | 15.0           | 1.7            | 75.3           | 110.0          | 88  |
|                          |         |             |          |               |                             |                          |                                 |                                       | 21.0                            | 39.4           | 4.5            | 35.0           | 86.9           |     |
|                          |         |             |          |               |                             |                          |                                 |                                       | 32.3                            | 60.7           | 7.0            | 0              | 66.9           |     |
| FeK/9mmZ                 | H-ZSM-5 | 300         | 20.0     | 15.1          | 50.0                        | 11.0                     | 50.7                            | 3.8                                   | 13.4                            | 66.9           | 0              | 19.6           | 78.9           | 111 |
|                          |         |             |          |               |                             |                          |                                 |                                       | 13.4                            | 48.9           | 18             | 19.6           | 83.4           |     |
|                          |         |             |          |               |                             |                          |                                 |                                       | 13.4                            | 0              | 66.9           | 19.6           | 95.7           |     |
| FeK/13mmZ                | H-ZSM-5 | 300         | 20.0     | 21.4          | 50.0                        | 10                       | 52.8                            | 5.7                                   | 15.8                            | 57.5           | 0              | 26.7           | 82.0           | 111 |
|                          |         |             |          |               |                             |                          |                                 |                                       | 15.8                            | 39.5           | 18             | 26.7           | 86.4           |     |
|                          |         |             |          |               |                             |                          |                                 |                                       | 15.8                            | 0              | 57.5           | 26.7           | 96.3           |     |
| FeK/17mmZ                | H-ZSM-5 | 300         | 20.0     | 20.8          | 50.0                        | 9                        | 55.1                            | 5.7                                   | 16.9                            | 48.8           | 0              | 34.3           | 86.3           | 111 |
|                          |         |             |          |               |                             |                          |                                 |                                       | 16.9                            | 30.8           | 18             | 34.3           | 90.7           |     |
|                          |         |             |          |               |                             |                          |                                 |                                       | 16.9                            | 0              | 48.8           | 34.3           | 98.3           |     |
| Fe-Z-30-5                | H-ZSM-5 | 300         | 20.0     | 25.6          | 45<br><i>estimation</i>     | 27.3                     | 12.9                            | 1.8                                   | 3.3                             | 26.3           | 3.3            | 67             | 96.4           | 112 |
|                          |         |             |          |               |                             |                          |                                 |                                       | 6.6                             | 51.9           | 6.5            | 35             | 67.9           |     |
|                          |         |             |          |               |                             |                          |                                 |                                       | 10.1                            | 79.8           | 10.1           | 0              | 36.7           |     |
| Fe-Z-50-5                | H-ZSM-5 | 300         | 20.0     | 30.9          | 45<br><i>estimation</i>     | 28                       | 10.2                            | 1.7                                   | 2.9                             | 22.8           | 3.5            | 70.8           | 99.1           | 112 |
|                          |         |             |          |               |                             |                          |                                 |                                       | 6.4                             | 50.8           | 7.8            | 35             | 66.6           |     |
|                          |         |             |          |               |                             |                          |                                 |                                       | 9.9                             | 78.2           | 11.9           | 0              | 34.9           |     |
| Fe-Z-80-5                | H-ZSM-5 | 300         | 20.0     | 69.4          | 45<br><i>estimation</i>     | 23.8                     | 32.0                            | 12.2                                  | 4.1                             | 30.3           | 7.8            | 57.9           | 90.5           | 112 |
|                          |         |             |          |               |                             |                          |                                 |                                       | 6.3                             | 46.7           | 12             | 35             | 72.0           |     |
|                          |         |             |          |               |                             |                          |                                 |                                       | 9.6                             | 71.9           | 18.5           | 0              | 43.9           |     |
| Fe-Z-80-10               | H-ZSM-5 | 300         | 20.0     | 35            | 45<br><i>estimation</i>     | 21.3                     | 36.2                            | 7.0                                   | 3.4                             | 26.1           | 13.4           | 57             | 90.7           | 112 |
|                          |         |             |          |               |                             |                          |                                 |                                       | 5.1                             | 39.5           | 20.3           | 35             | 73.1           |     |
|                          |         |             |          |               |                             |                          |                                 |                                       | 7.9                             | 60.8           | 31.3           | 0              | 45.0           |     |
| Fe-Z-80-15               | H-ZSM-5 | 300         | 20.0     | 56.3          | 45<br><i>estimation</i>     | 18.7                     | 43.1                            | 13.3                                  | 3                               | 23.7           | 19.6           | 53.7           | 89.8           | 112 |
|                          |         |             |          |               |                             |                          |                                 |                                       | 4.3                             | 33.2           | 27.5           | 35             | 75.3           |     |
|                          |         |             |          |               |                             |                          |                                 |                                       | 6.6                             | 51.1           | 42.3           | 0              | 48.3           |     |
| Fe-Z-100-5               | H-ZSM-5 | 300         | 20.0     | 65.3          | 45<br><i>estimation</i>     | 25                       | 24.9                            | 8.9                                   | 4.5                             | 33.2           | 18.9           | 43.4           | 82.5           | 112 |
|                          |         |             |          |               |                             |                          |                                 |                                       | 5.2                             | 38.1           | 21.7           | 35             | 76.2           |     |
|                          |         |             |          |               |                             |                          |                                 |                                       | 7.9                             | 58.6           | 33.4           | 0              | 50.4           |     |
| Fe-Z-300-5               | H-ZSM-5 | 300         | 20.0     | 73.3          | 45<br><i>estimation</i>     | 27.7                     | 15.6                            | 6.3                                   | 3.7                             | 27.8           | 34.5           | 34             | 79.2           | 112 |
|                          |         |             |          |               |                             |                          |                                 |                                       | 3.7                             | 44.3           | 18             | 34             | 74.5           |     |
|                          |         |             |          |               |                             |                          |                                 |                                       | 3.7                             | 62.3           | 0              | 34             | 69.4           |     |
| Fe/SiO <sub>2</sub> -M   | H-ZSM-5 | 280         | 10       | 60            | 29.9                        | 7                        | 49.3                            | 20.7                                  | 14.5                            | 26.2           | 59.3           | 0              | 88.3           | 113 |
|                          |         |             |          |               |                             |                          |                                 |                                       | 29.1                            | 52.9           | 18             | 0              | 64.5           |     |
|                          |         |             |          |               |                             |                          |                                 |                                       | 35.5                            | 64.5           | 0              | 0              | 54.2           |     |
| Fe/SiO <sub>2</sub> -S-Z | H-ZSM-5 | 280         | 10       | 54.8          | 33.8                        | 14.9                     | 51.2                            | 18.6                                  | 21.3                            | 48             | 30.7           | 0              | 73.8           | 113 |
|                          |         |             |          |               |                             |                          |                                 |                                       | 25.2                            | 56.8           | 18             | 0              | 68.4           |     |
|                          |         |             |          |               |                             |                          |                                 |                                       | 30.8                            | 69.2           | 0              | 0              | 60.8           |     |
| FeNa@Si-c+HZSM-5         | H-ZSM-5 | 260         | 20       | 49.8          | 14.3                        | 7                        | 62.5                            | 26.7                                  | 18.3                            | 46.3           | 10.8           | 24.6           | 68.2           | 114 |

**Table S18:** reported catalytic performance of bifunctional OX-ZEO catalysts for the direct conversion of synthesis gas to gasoline.

| catalyst                                                      | zeolite | temperature<br>°C | pressure<br>bar(g) | CO conversion<br>% | CO <sub>2</sub> selectivity<br>% <sub>c</sub> | hydrocarbon distribution          |                                                   |                                                         |                                 |                                 | C <sub>5</sub> -C <sub>11</sub> |                             |               | ref |
|---------------------------------------------------------------|---------|-------------------|--------------------|--------------------|-----------------------------------------------|-----------------------------------|---------------------------------------------------|---------------------------------------------------------|---------------------------------|---------------------------------|---------------------------------|-----------------------------|---------------|-----|
|                                                               |         |                   |                    |                    |                                               | CH <sub>4</sub><br>% <sub>c</sub> | C <sub>5</sub> -C <sub>11</sub><br>% <sub>c</sub> | C <sub>5</sub> -C <sub>11</sub> yield<br>% <sub>c</sub> | lin paraffins<br>% <sub>c</sub> | iso-paraffins<br>% <sub>c</sub> | olefins<br>% <sub>c</sub>       | aromatics<br>% <sub>c</sub> | octane number |     |
| Zn <sub>2</sub> Mn <sub>1</sub> O <sub>x</sub> /SAPO-11 = 2/1 | SAPO-11 | 360               | 40                 | 20.3               | 50                                            | 2.3                               | 76.7                                              | 7.8                                                     | 3.6                             | 52.3                            | 27.8                            | 16.3                        | 89.4          | 115 |
| ZnAl <sub>2</sub> O <sub>4</sub> /SAPO-11                     | SAPO-11 | 350               | 30                 | 36                 | 44                                            | 2.4                               | 70.0                                              | 14.1                                                    | 5.5                             | 77.2                            | 17.3                            | 0                           | 73.1          | 43  |
| ZnAl <sub>2</sub> O <sub>4</sub> /SAPO-31                     | SAPO-31 | 350               | 30                 | 22                 | 40                                            | 1.3                               | 66.8                                              | 8.8                                                     | 5                               | 78.1                            | 16.9                            | 0                           | 72.7          | 43  |

**Table S19:** reported catalytic performance of bifunctional catalysts for the direct conversion of synthesis gas to gasoline operated in dual bed mode with dedicated temperatures.

| catalyst                                                                          | zeolite      | temperature                        | pressure | CO conversion | CO <sub>2</sub> selectivity | hydrocarbon distribution       |                                                |                                                      | C <sub>5</sub> -C <sub>11</sub> |                              |                        |                          | ref          |               |
|-----------------------------------------------------------------------------------|--------------|------------------------------------|----------|---------------|-----------------------------|--------------------------------|------------------------------------------------|------------------------------------------------------|---------------------------------|------------------------------|------------------------|--------------------------|--------------|---------------|
|                                                                                   |              |                                    |          |               |                             | CH <sub>4</sub> % <sub>c</sub> | C <sub>5</sub> -C <sub>11</sub> % <sub>c</sub> | C <sub>5</sub> -C <sub>11</sub> yield % <sub>c</sub> | lin paraffins % <sub>c</sub>    | iso-paraffins % <sub>c</sub> | olefins % <sub>c</sub> | aromatics % <sub>c</sub> |              | octane number |
|                                                                                   |              | °C                                 | bar(g)   | %             | % <sub>c</sub>              | % <sub>c</sub>                 | % <sub>c</sub>                                 | % <sub>c</sub>                                       | % <sub>c</sub>                  | % <sub>c</sub>               | % <sub>c</sub>         | % <sub>c</sub>           |              |               |
| <b>CZA + Al<sub>2</sub>O<sub>3</sub><sup>1</sup><br/>nano-H-ZSM-5<sup>2</sup></b> | nano-H-ZSM-5 | 260 <sup>1</sup> /320 <sup>2</sup> | 30       | 88            | 32                          | 3                              | 77.8                                           | 46.6                                                 | 2.7                             | 51.1                         | 2.4                    | 43.8                     | <b>100.3</b> | 116           |
|                                                                                   |              |                                    |          |               |                             |                                |                                                |                                                      | 3.1                             | 59.1                         | 2.7                    | 35                       | <b>96.4</b>  |               |
|                                                                                   |              |                                    |          |               |                             |                                |                                                |                                                      | 4.8                             | 91                           | 4.2                    | 0                        | <b>80.8</b>  |               |
| <b>CMA Z-300</b>                                                                  | H-ZSM-5      | 270 <sup>1</sup> /320 <sup>2</sup> | 10       | 38            | 37.5                        | 2.1                            | 69.5                                           | 16.5                                                 | 4.2                             | 21.2                         | 3.1                    | 71.5                     | <b>108.1</b> | 83            |
|                                                                                   |              |                                    |          |               |                             |                                |                                                |                                                      | 9.7                             | 48.3                         | 7                      | 35                       | <b>87.5</b>  |               |
|                                                                                   |              |                                    |          |               |                             |                                |                                                |                                                      | 14.9                            | 74.3                         | 10.8                   | 0                        | <b>67.6</b>  |               |

<sup>1</sup>: upstream bed, <sup>2</sup>: downstream bed

**Table S20:** combined reported catalytic performance of catalysts for the conversion of synthesis gas to gasoline combining methanol synthesis and MTG in individual processes.

| catalyst                              | conversion<br>% | CO <sub>2</sub> selectivity<br>% <sub>c</sub> | methanol selectivity<br>% <sub>c</sub> | gasoline selectivity from methanol<br>% <sub>c</sub> | gasoline selectivity from synthesis gas<br>% <sub>c</sub> | yield<br>% <sub>c</sub> | ref    |
|---------------------------------------|-----------------|-----------------------------------------------|----------------------------------------|------------------------------------------------------|-----------------------------------------------------------|-------------------------|--------|
| <b>MeOH</b>                           |                 |                                               |                                        |                                                      |                                                           |                         |        |
| Cu/ZnO/Al <sub>2</sub> O <sub>3</sub> | 8.6             | 0                                             | 97.7                                   |                                                      |                                                           | 8.4                     | 30     |
| 2Cu_MCF 10.7                          | 10.7            | 0                                             | 97                                     |                                                      |                                                           | 10.4                    | 31     |
| Cu/ZnO/Al <sub>2</sub> O <sub>3</sub> | 29.9            | 0                                             | 99.6                                   |                                                      |                                                           | 29.8                    | 30     |
| Cu/ZnO/Al <sub>2</sub> O <sub>3</sub> | 34.4            | 0                                             | 99.8                                   |                                                      |                                                           | 34.3                    | 30     |
| Cu/ZnO/Al <sub>2</sub> O <sub>3</sub> | 40.3            | 0                                             | 98.7                                   |                                                      |                                                           | 39.8                    | 30     |
| Cu/ZnO/Al <sub>2</sub> O <sub>3</sub> | 47              | 0                                             | 98.9                                   |                                                      |                                                           | 46.5                    | 30     |
| <b>MTG</b>                            |                 |                                               |                                        |                                                      |                                                           |                         |        |
| CUO/NH <sub>4</sub> -ZSM-5(%3)        | 99.6            | 0                                             |                                        | 100                                                  |                                                           | 99.6                    | 117    |
| CUO/NH <sub>4</sub> -ZSM-5(%5)        | 99.7            | 0                                             |                                        | 100                                                  |                                                           | 99.7                    | 117    |
| CUO/NH <sub>4</sub> -ZSM-5(%7)        | 99.9            | 0                                             |                                        | 100                                                  |                                                           | 99.9                    | 117    |
| CUO/NH <sub>4</sub> -ZSM-5(%9)        | 99              | 0                                             |                                        | 100                                                  |                                                           | 99                      | 117    |
| Zn/HZ5/0.3AT                          | 100             | 0                                             |                                        | 99.4                                                 |                                                           | 99.4                    | 117    |
| HZ5/0.3AT                             | 100             | 0                                             |                                        | 99.3                                                 |                                                           | 99.3                    | 117    |
| HZ5/0.1AT                             | 100             | 0                                             |                                        | 99.2                                                 |                                                           | 99.2                    | 117    |
| <b>dual reactor process</b>           |                 |                                               |                                        |                                                      |                                                           |                         |        |
| Cu/ZnO/Al <sub>2</sub> O <sub>3</sub> | 8.6             | 0                                             |                                        |                                                      | 97                                                        | 8.4                     | 30,117 |
| 2Cu_MCF 10.7                          | 10.7            | 0                                             |                                        |                                                      | 96                                                        | 10.3                    | 31,117 |
| Cu/ZnO/Al <sub>2</sub> O <sub>3</sub> | 29.9            | 0                                             |                                        |                                                      | 99                                                        | 29.6                    | 30,117 |
| Cu/ZnO/Al <sub>2</sub> O <sub>3</sub> | 34.4            | 0                                             |                                        |                                                      | 99                                                        | 34.1                    | 30,117 |
| Cu/ZnO/Al <sub>2</sub> O <sub>3</sub> | 40.3            | 0                                             |                                        |                                                      | 98                                                        | 39.6                    | 30,117 |
| Cu/ZnO/Al <sub>2</sub> O <sub>3</sub> | 47              | 0                                             |                                        |                                                      | 98                                                        | 46.2                    | 30,117 |

## 5. References

1. Sun, Y. & Zhao, Z. Implanting Copper–Zinc Nanoparticles into the Matrix of Mesoporous Alumina as a Highly Selective Bifunctional Catalyst for Direct Synthesis of Dimethyl Ether from Syngas. *ChemCatChem* **12**, 1276–1281 (2020).
2. Pinkaew, K. *et al.* A new core-shell-like capsule catalyst with SAPO-46 zeolite shell encapsulated Cr/ZnO for the controlled tandem synthesis of dimethyl ether from syngas. *Fuel* **111**, 727–732 (2013).
3. Lima, S. H., Forrester, A. M. S., Palacio, L. A. & Faro, A. C. Niobia-alumina as methanol dehydration component in mixed catalyst systems for dimethyl ether production from syngas. *Appl. Catal. A Gen.* **488**, 19–27 (2014).
4. Gentzen, M. *et al.* Bifunctional hybrid catalysts derived from Cu/Zn-based nanoparticles for single-step dimethyl ether synthesis. *Catal. Sci. Technol.* **6**, 1054–1063 (2016).
5. Yang, G., Wang, D., Yoneyama, Y., Tan, Y. & Tsubaki, N. Facile synthesis of H-type zeolite shell on a silica substrate for tandem catalysis. *Chem. Commun.* **48**, 1263–1265 (2012).
6. Ahmad, R. *et al.* Zeolite-based bifunctional catalysts for the single step synthesis of dimethyl ether from CO-rich synthesis gas. *Fuel Process. Technol.* **121**, 38–46 (2014).
7. Gentzen, M. *et al.* An intermetallic Pd<sub>2</sub>Ga nanoparticle catalyst for the single-step conversion of CO-rich synthesis gas to dimethyl ether. *Appl. Catal. A Gen.* **562**, 206–214 (2018).
8. Sai Prasad, P. S., Bae, J. W., Kang, S.-H., Lee, Y.-J. & Jun, K.-W. Single-step synthesis of DME from syngas on Cu–ZnO–Al<sub>2</sub>O<sub>3</sub>/zeolite bifunctional catalysts: The superiority of ferrierite over the other zeolites. *Fuel Process. Technol.* **89**, 1281–1286 (2008).
9. Karaman, B. P., Oktar, N., Doğu, G. & Dogu, T. Heteropolyacid Incorporated Bifunctional Core-Shell Catalysts for Dimethyl Ether Synthesis from Carbon Dioxide/Syngas. *Catalysts* **12**, (2022).
10. Kang, S.-H., Bae, J. W., Jun, K.-W. & Potdar, H. S. Dimethyl ether synthesis from syngas over the composite catalysts of Cu–ZnO–Al<sub>2</sub>O<sub>3</sub>/Zr-modified zeolites. *Catal. Commun.* **9**, 2035–2039 (2008).
11. Guo, Y. & Zhao, Z. Ethanol as a Binder to Fabricate a Highly-Efficient Capsule-Structured CuO–ZnO–Al<sub>2</sub>O<sub>3</sub>@HZSM-5 Catalyst for Direct Production of Dimethyl Ether from Syngas. *ChemCatChem* (2019) doi:10.1002/cctc.201901938.
12. Palomo, J., Rodríguez-Cano, M. Á., Rodríguez-Mirasol, J. & Cordero, T. ZSM-5-decorated CuO/ZnO/ZrO<sub>2</sub> fibers as efficient bifunctional catalysts for the direct synthesis of DME from syngas. *Appl. Catal. B Environ.* **270**, 118893 (2020).
13. Jung, J. W. *et al.* Effect of copper surface area and acidic sites to intrinsic catalytic activity for dimethyl ether synthesis from biomass-derived syngas. *Appl. Catal. B Environ.* **126**, 1–8 (2012).
14. Stiefel, M., Ahmad, R., Arnold, U. & Döring, M. Direct synthesis of dimethyl ether from carbon-monoxide-rich synthesis gas: Influence of dehydration catalysts and operating conditions. *Fuel Process. Technol.* **92**, 1466–1474 (2011).
15. Flores, J. H., Peixoto, D. P. B., Appel, L. G., de Avillez, R. R. & Silva, M. I. P. da. The influence of different methanol synthesis catalysts on direct synthesis of DME from syngas. *Catal. Today* **172**, 218–225 (2011).
16. Li, Z., Li, J., Yang, C. & Wu, J. Enhanced catalytic performance for direct synthesis of dimethyl ether from syngas over a La<sub>2</sub>O<sub>3</sub> modified Cu-ZrO<sub>2</sub>/γ-Al<sub>2</sub>O<sub>3</sub> hybrid catalyst. *J. Nat. Gas Chem.* **21**, 360–365 (2012).
17. Gentzen, M. *et al.* Bifunctional catalysts based on colloidal Cu/Zn nanoparticles for the direct conversion of synthesis gas to dimethyl ether and hydrocarbons. *Appl. Catal. A Gen.* **557**, 99–107 (2018).
18. Lee, Y. J. *et al.* Single-step synthesis of dimethyl ether from syngas on Al<sub>2</sub>O<sub>3</sub>-modified CuO–ZnO–Al<sub>2</sub>O<sub>3</sub>/ferrierite catalysts: Effects of Al<sub>2</sub>O<sub>3</sub> content. *Catal. Today* **228**, 175–182 (2014).
19. Mejía, C. H., Verbart, D. M. A. & de Jong, K. P. Niobium-based solid acids in combination with a methanol synthesis catalyst for the direct production of dimethyl ether from synthesis gas. *Catal. Today* **369**, 77–87 (2021).

20. Phienluphon, R. *et al.* Designing core (Cu/ZnO/Al<sub>2</sub>O<sub>3</sub>)–shell (SAPO-11) zeolite capsule catalyst with a facile physical way for dimethyl ether direct synthesis from syngas. *Chem. Eng. J.* **270**, 605–611 (2015).
21. Guo, X. *et al.* One-step synthesis of dimethyl ether from biomass-derived syngas on CuO-ZnO-Al<sub>2</sub>O<sub>3</sub>/HZSM-5 hybrid catalyst: Combination method, synergistic effect, water-gas shift reaction and catalytic performance. *Catal. Today* **407**, 125–134 (2023).
22. Baek, S.-C. *et al.* Effect of Copper Precursors to the Activity for Dimethyl Ether Synthesis from Syngas over Cu–ZnO/ $\gamma$ -Al<sub>2</sub>O<sub>3</sub> Bifunctional Catalysts. *Energy & Fuels* **25**, 2438–2443 (2011).
23. Mao, D. *et al.* Highly effective hybrid catalyst for the direct synthesis of dimethyl ether from syngas with magnesium oxide-modified HZSM-5 as a dehydration component. *J. Catal.* **230**, 140–149 (2005).
24. Liuzzi, D. *et al.* Increasing dimethyl ether production from biomass-derived syngas by in situ steam adsorption. *Sustain. Energy Fuels* (2020) doi:10.1039/D0SE01172J.
25. Guffanti, S., Visconti, C. G. & Groppi, G. Model Analysis of the Role of Kinetics, Adsorption Capacity, and Heat and Mass Transfer Effects in Sorption Enhanced Dimethyl Ether Synthesis. *Ind. Eng. Chem. Res.* **60**, 6767–6783 (2021).
26. Boon, J. & Berkel, F. P. F. Van. Separation Enhanced Dimethyl Ether Synthesis. *Fifth Int. Conf. 2017 Tailor Made Fuels from Biomass* (2017).
27. van Kampen, J., Boon, J., Vente, J. & van Sint Annaland, M. Sorption enhanced dimethyl ether synthesis under industrially relevant conditions: experimental validation of pressure swing regeneration. *React. Chem. Eng.* **6**, 244–257 (2021).
28. van Kampen, J., Boon, J., Vente, J. & van Sint Annaland, M. Sorption enhanced dimethyl ether synthesis for high efficiency carbon conversion: Modelling and cycle design. *J. CO<sub>2</sub> Util.* **37**, 295–308 (2020).
29. Guffanti, S., Visconti, C. G., van Kampen, J., Boon, J. & Groppi, G. Reactor modelling and design for sorption enhanced dimethyl ether synthesis. *Chem. Eng. J.* **404**, 126573 (2021).
30. Reubroycharoen, P. *et al.* Continuous low-temperature methanol synthesis from syngas using alcohol promoters. *Energy and Fuels* **17**, 817–821 (2003).
31. Pompe, C. E. *et al.* Stability of mesocellular foam supported copper catalysts for methanol synthesis. *Catal. Today* **334**, 79–89 (2019).
32. Sabour, B., Peyrovi, M. H., Hamoule, T. & Rashidzadeh, M. Catalytic dehydration of methanol to dimethyl ether (DME) over Al-HMS catalysts. *J. Ind. Eng. Chem.* **20**, 222–227 (2014).
33. Liu, X. *et al.* Design of efficient bifunctional catalysts for direct conversion of syngas into lower olefins: Via methanol/dimethyl ether intermediates. *Chem. Sci.* **9**, 4708–4718 (2018).
34. Su, J. *et al.* High Conversion of Syngas to Ethene and Propene on Bifunctional Catalysts via the Tailoring of SAPO Zeolite Structure. *Cell Reports Phys. Sci.* **2**, 100290 (2021).
35. Yang, G., Meng, F., Zhang, P., Yang, L. & Li, Z. Effects of preparation method and precipitant on Mn–Ga oxide in combination with SAPO-34 for syngas conversion into light olefins. *New J. Chem.* **45**, 7967–7976 (2021).
36. Jiao, F. *et al.* Selective conversion of syngas to light olefins. *Science (80-. )*. **351**, 1065–1068 (2016).
37. Du, C. *et al.* One-step conversion of syngas to light olefins over bifunctional metal-zeolite catalyst. *Chinese J. Chem. Eng.* **36**, 101–110 (2021).
38. Ren, L. *et al.* Syngas to light olefins over ZnAlO<sub>x</sub> and high-silica CHA prepared by boron-assisted hydrothermal synthesis. *Fuel* **307**, 121916 (2022).
39. Meng, F. *et al.* Unraveling the role of GaZrO<sub>x</sub> structure and oxygen vacancy in bifunctional catalyst for highly active and selective conversion of syngas into light olefins. *Chem. Eng. J.* **467**, 143500 (2023).
40. Huang, Y. *et al.* Direct Conversion of Syngas to Light Olefins over a ZnCrO<sub>x</sub> + H-SSZ-13 Bifunctional Catalyst. *ACS Omega* **6**, 10953–10962 (2021).
41. Su, J. *et al.* Direct Conversion of Syngas into Light Olefins over Zirconium-Doped Indium(III) Oxide and SAPO-34 Bifunctional Catalysts: Design of Oxide Component and Construction of Reaction



- Network. *ChemCatChem* **10**, 1536–1541 (2018).
42. Huang, Y. *et al.* Utilization of SAPO-18 or SAPO-35 in the bifunctional catalyst for the direct conversion of syngas to light olefins. *RSC Adv.* **11**, 13876–13884 (2021).
  43. Wang, M. *et al.* Effect of zeolite topology on the hydrocarbon distribution over bifunctional ZnAlO/SAPO catalysts in syngas conversion. *Catal. Today* **371**, 85–92 (2021).
  44. Meng, F. *et al.* Effect of zeolite topological structure in bifunctional catalyst on direct conversion of syngas to light olefins. *Microporous Mesoporous Mater.* **362**, 112792 (2023).
  45. Wang, M. *et al.* Synthesis of hierarchical SAPO-34 to improve the catalytic performance of bifunctional catalysts for syngas-to-olefins reactions. *J. Catal.* **394**, 181–192 (2021).
  46. Su, J. *et al.* Syngas to light olefins conversion with high olefin/paraffin ratio using ZnCrO<sub>x</sub>/AlPO-18 bifunctional catalysts. *Nat. Commun.* **10**, (2019).
  47. Jiao, F. *et al.* Shape-Selective Zeolites Promote Ethylene Formation from Syngas via a Ketene Intermediate. *Angew. Chemie - Int. Ed.* **57**, 4692–4696 (2018).
  48. Meng, F., Li, B., Zhang, J., Wang, L. & Li, Z. Role of Zn-Al oxide structure and oxygen vacancy in bifunctional catalyst for syngas conversion to light olefins. *Fuel* **346**, 128351 (2023).
  49. Li, G. *et al.* Role of SAPO-18 Acidity in Direct Syngas Conversion to Light Olefins. *ACS Catal.* **10**, 12370–12375 (2020).
  50. Ding, Y. *et al.* Effects of Proximity-Dependent Metal Migration on Bifunctional Composites Catalyzed Syngas to Olefins. *ACS Catal.* **11**, 9729–9737 (2021).
  51. Jiao, F. *et al.* Disentangling the activity-selectivity trade-off in catalytic conversion of syngas to light olefins. *Science (80-. )*. **380**, 727–730 (2023).
  52. Wang, S. *et al.* Direct Conversion of Syngas into Light Olefins with Low CO<sub>2</sub> Emission. *ACS Catal.* **10**, 2046–2059 (2020).
  53. Tan, L. *et al.* Design of a core-shell catalyst: an effective strategy for suppressing side reactions in syngas for direct selective conversion to light olefins. *Chem. Sci.* **11**, 4097–4105 (2020).
  54. Zhong, L. *et al.* Cobalt carbide nanoprisms for direct production of lower olefins from syngas. *Nature* **538**, 84–87 (2016).
  55. Gu, B. *et al.* Effects of the promotion with bismuth and lead on direct synthesis of light olefins from syngas over carbon nanotube supported iron catalysts. *Appl. Catal. B Environ.* **234**, 153–166 (2018).
  56. Xie, J. *et al.* Promoted cobalt metal catalysts suitable for the production of lower olefins from natural gas. *Nat. Commun.* **10**, 1–10 (2019).
  57. Liu, Z., Jia, G., Zhao, C. & Xing, Y. Efficient Fischer-Tropsch to light olefins over iron-based catalyst with low methane selectivity and high olefin/paraffin ratio. *Fuel* **288**, 119572 (2021).
  58. Zhai, P. *et al.* Highly Tunable Selectivity for Syngas-Derived Alkenes over Zinc and Sodium-Modulated Fe<sub>5</sub>C<sub>2</sub>Catalyst. *Angew. Chemie - Int. Ed.* **55**, 9902–9907 (2016).
  59. Fatih, Y., Burgun, U., Sarioglan, A. & Atakül, H. Effect of sodium incorporation into Fe-Zn catalyst for Fischer-Tropsch synthesis to light olefins. *Mol. Catal.* **535**, 112866 (2023).
  60. Torres Galvis, H. M. *et al.* Effect of precursor on the catalytic performance of supported iron catalysts for the Fischer-Tropsch synthesis of lower olefins. *Catal. Today* **215**, 95–102 (2013).
  61. Torres Galvis, H. M. *et al.* Supported iron nanoparticles as catalysts for sustainable production of lower olefins. *Science (80-. )*. **335**, 835–838 (2012).
  62. Liu, X., Lin, T., Liu, P. & Zhong, L. Hydrophobic interfaces regulate iron carbide phases and catalytic performance of FeZnOx nanoparticles for Fischer-Tropsch to olefins. *Appl. Catal. B Environ.* **331**, 122697 (2023).
  63. Di, Z., Zhao, T., Feng, X. & Luo, M. A Newly Designed Core-Shell-Like Zeolite Capsule Catalyst for Synthesis of Light Olefins from Syngas via Fischer-Tropsch Synthesis Reaction. *Catal. Letters* **149**,

- 441–448 (2019).
64. Wu, L. & Hensen, E. J. M. Comparison of mesoporous SSZ-13 and SAPO-34 zeolite catalysts for the methanol-to-olefins reaction. *Catal. Today* **235**, 160–168 (2014).
  65. Huang, Z. *et al.* Ceria-Zirconia/Zeolite Bifunctional Catalyst for Highly Selective Conversion of Syngas into Aromatics. *ChemCatChem* **10**, 4519–4524 (2018).
  66. Yang, J., Pan, X., Jiao, F., Li, J. & Bao, X. Direct conversion of syngas to aromatics. *Chem. Commun.* **53**, 11146–11149 (2017).
  67. Ji, Y. *et al.* Oxygenate-based routes regulate syngas conversion over oxide–zeolite bifunctional catalysts. *Nat. Catal.* **5**, 594–604 (2022).
  68. Ma, D. *et al.* The Direct Synthesis of Aromatic Hydrocarbons from Syngas over Bifunctional MgZrOx/HZSM-5 Catalysts. *Catalysts* vol. 13 (2023).
  69. Wang, S., Fang, Y., Huang, Z., Xu, H. & Shen, W. The Effects of the Crystalline Phase of Zirconia on C – O Activation and C – C Coupling in Converting Syngas into Aromatics. *Catalysts* **10**, (2020).
  70. Fu, Y. *et al.* Insights into the size effect of ZnCr2O4 spinel oxide in composite catalysts for conversion of syngas to aromatics. *Green Energy Environ.* (2021) doi:https://doi.org/10.1016/j.gee.2021.07.003.
  71. Yang, X. *et al.* The influence of intimacy on the ‘iterative reactions’ during OX-ZEO process for aromatic production. *J. Energy Chem.* **35**, 60–65 (2019).
  72. Arslan, M. T. *et al.* Highly Selective Conversion of CO<sub>2</sub> or CO into Precursors for Kerosene-Based Aviation Fuel via an Aldol–Aromatic Mechanism. *ACS Catal.* **12**, 2023–2033 (2022).
  73. Yang, J. *et al.* Enhanced aromatic selectivity by the sheet-like ZSM-5 in syngas conversion. *J. Energy Chem.* **35**, 44–48 (2019).
  74. Cheng, K. *et al.* Bifunctional Catalysts for One-Step Conversion of Syngas into Aromatics with Excellent Selectivity and Stability. *Chem* **3**, 334–347 (2017).
  75. Ma, Z. *et al.* Catalytic roles of acid property in different morphologies of H-ZSM-5 zeolites for syngas-to-aromatics conversion over ZnCrOx/H-ZSM-5 catalysts. *Microporous Mesoporous Mater.* **349**, 112420 (2023).
  76. Liu, J. *et al.* Nano-ZrO<sub>2</sub> as hydrogenation phase in bi-functional catalyst for syngas aromatization. *Fuel* **263**, 116803 (2020).
  77. Zhou, W. *et al.* Selective Conversion of Syngas to Aromatics over a Mo–ZrO<sub>2</sub>/H-ZSM-5 Bifunctional Catalyst. *ChemCatChem* **11**, 1681–1688 (2019).
  78. Tian, G. *et al.* Accelerating syngas-to-aromatic conversion via spontaneously monodispersed Fe in ZnCr<sub>2</sub>O<sub>4</sub> spinel. *Nat. Commun.* **13**, 5567 (2022).
  79. Zhang, P., Tan, L., Yang, G. & Tsubaki, N. One-pass selective conversion of syngas to para-xylene. *Chem. Sci.* **8**, 7941–7946 (2017).
  80. Zhou, W. *et al.* Direct conversion of syngas into aromatics over a bifunctional catalyst: Inhibiting net CO<sub>2</sub> release. *Chem. Commun.* **56**, 5239–5242 (2020).
  81. Wang, Y. *et al.* Boosting the synthesis of value-added aromatics directly from syngas via a Cr<sub>2</sub>O<sub>3</sub> and Ga doped zeolite capsule catalyst. *Chem. Sci.* **12**, 7786–7792 (2021).
  82. Xu, Y., Liu, D. & Liu, X. Conversion of syngas toward aromatics over hybrid Fe-based Fischer-Tropsch catalysts and HZSM-5 zeolites. *Appl. Catal. A Gen.* **552**, 168–183 (2018).
  83. Tao Sun, Tiejun Lin, Yunlei An, Kun Gong, Liangshu Zhong, and Y. S. Syngas Conversion to Aromatics over Co<sub>2</sub>C- based Catalyst and HZSM-5 via Tandem System. *Ind. Eng. Chem. Res.* **59**, 4419–4427 (2020).
  84. Wang, T. *et al.* Sodium-Mediated Bimetallic Fe–Ni Catalyst Boosts Stable and Selective Production of Light Aromatics over HZSM-5 Zeolite. *ACS Catal.* **11**, 3553–3574 (2021).
  85. Xu, Y. *et al.* Yolk@Shell FeMn@Hollow HZSM-5 Nanoreactor for Directly Converting Syngas to

- Aromatics. *ACS Catal.* **11**, 4476–4485 (2021).
86. Xu, Y. *et al.* Selective Conversion of Syngas to Aromatics over Fe<sub>3</sub>O<sub>4</sub>@MnO<sub>2</sub> and Hollow HZSM-5 Bifunctional Catalysts. *ACS Catal.* **9**, 5147–5156 (2019).
  87. Xu, Y. *et al.* Synthesis of aromatics from syngas over FeMnK/SiO<sub>2</sub> and HZSM-5 tandem catalysts. *Mol. Catal.* **454**, 104–113 (2018).
  88. Wang, H. *et al.* Bifunctional catalysts with versatile zeolites enable unprecedented para-xylene productivity for syngas conversion under mild conditions. *Chem Catal.* **2**, 779–796 (2022).
  89. Nawaz, M. A. *et al.* Tailoring the synergistic dual-decoration of (Cu–Co) transition metal auxiliaries in Fe-oxide/zeolite composite catalyst for the direct conversion of syngas to aromatics. *Catal. Sci. Technol.* **11**, 7992–8006 (2021).
  90. Zhao, B. *et al.* Direct Transformation of Syngas to Aromatics over Na-Zn-Fe<sub>5</sub>C<sub>2</sub> and Hierarchical HZSM-5 Tandem Catalysts. *Chem* **3**, 323–333 (2017).
  91. Kang, S. C. *et al.* Enhancing selectivity of aromatics in direct conversion of syngas over K/FeMn and HZSM-5 bifunctional catalysts. *Mol. Catal.* **533**, 112790 (2022).
  92. Wen, C. *et al.* Insight into the direct conversion of syngas toward aromatics over the Cu promoter Fe-zeolite tandem catalyst. *Fuel* **331**, 125855 (2023).
  93. Jia, Y. *et al.* Hierarchical ZSM-5 zeolite synthesized via dry gel conversion-steam assisted crystallization process and its application in aromatization of methanol. *Powder Technol.* **328**, 415–429 (2018).
  94. Gao, P. *et al.* A Mechanistic Study of Methanol-to-Aromatics Reaction over Ga-Modified ZSM-5 Zeolites: Understanding the Dehydrogenation Process. *ACS Catal.* **8**, 9809–9820 (2018).
  95. Kim, S., Kim, Y. T., Hwang, A., Jun, K. W. & Kwak, G. Coke-Tolerant Gadolinium-Promoted HZSM-5 Catalyst for Methanol Conversion into Hydrocarbons. *ChemCatChem* **9**, 1569–1573 (2017).
  96. Niu, X. *et al.* Influence of crystal size on the catalytic performance of H-ZSM-5 and Zn/H-ZSM-5 in the conversion of methanol to aromatics. *Fuel Process. Technol.* **157**, 99–107 (2017).
  97. Zhang, J. *et al.* Solvent-Free Synthesis of Core-Shell Zn/ZSM-5@Silicalite-1 Catalyst for Selective Conversion of Methanol to BTX Aromatics. *Ind. Eng. Chem. Res.* **58**, (2019).
  98. Cai, L., Tripathi, R., Broda, R. & Pitsch, H. A property database of fuel compounds with emphasis on spark-ignition engine applications. *Appl. Energy Combust. Sci.* **5**, 100018 (2021).
  99. Perdih, A. & Perdih, F. Chemical interpretation of octane number. *Acta Chim. Slov.* **53**, 306–315 (2006).
  100. Egloff, Gusftav And Arsdell, P. M. Van. Octane rating relationships of aliphatic, alicyclic, mononuclear aromatic. *Inst. Pet.* **27**, 121–138 (1941).
  101. Lu, P. *et al.* Sputtered nano-cobalt on H-USY zeolite for selectively converting syngas to gasoline. *J. Energy Chem.* **24**, 637–641 (2015).
  102. Li, J. *et al.* Integrated tuneable synthesis of liquid fuels via Fischer–Tropsch technology. *Nat. Catal.* **1**, 787–793 (2018).
  103. Xing, C. *et al.* Hierarchical zeolite y supported cobalt bifunctional catalyst for facilely tuning the product distribution of Fischer-Tropsch synthesis. *Fuel* **148**, 48–57 (2015).
  104. Subramanian, V. *et al.* The Role of Steric Effects and Acidity in the Direct Synthesis of iso-Paraffins from Syngas on Cobalt Zeolite Catalysts. *ChemCatChem* **8**, 380–389 (2016).
  105. Sartipi, S., Van Dijk, J. E., Gascon, J. & Kapteijn, F. Toward bifunctional catalysts for the direct conversion of syngas to gasoline range hydrocarbons: H-ZSM-5 coated Co versus H-ZSM-5 supported Co. *Appl. Catal. A Gen.* **456**, 11–22 (2013).
  106. Zhu, C. & Bollas, G. M. Gasoline selective Fischer-Tropsch synthesis in structured bifunctional catalysts. *Appl. Catal. B Environ.* **235**, 92–102 (2018).
  107. Xing, C. *et al.* Completed encapsulation of cobalt particles in mesoporous H-ZSM-5 zeolite catalyst for direct synthesis of middle isoparaffin from syngas. *Catal. Commun.* **55**, 53–56 (2014).

108. Chen, Y. *et al.* Nano-ZSM-5 decorated cobalt based catalysts for Fischer-Tropsch synthesis to enhance the gasoline range products selectivity. *J. Taiwan Inst. Chem. Eng.* **116**, 153–159 (2020).
109. Wang, H. *et al.* The effect of the particle size on Fischer–Tropsch synthesis for ZSM-5 zeolite supported cobalt-based catalysts. *Chem. Commun.* **57**, 13522–13525 (2021).
110. Yakovenko, R. E. *et al.* Selective Synthesis of a Gasoline Fraction from CO and H<sub>2</sub> on a Co-SiO<sub>2</sub>/ZSM-5/Al<sub>2</sub>O<sub>3</sub> Catalyst. *Catalysts* vol. 13 (2023).
111. Weber, J. L. *et al.* Conversion of synthesis gas to aromatics at medium temperature with a fischer tropsch and ZSM-5 dual catalyst bed. *Catal. Today* **369**, 175–183 (2021).
112. Wen, C. *et al.* Effect of hierarchical ZSM-5 zeolite support on direct transformation from syngas to aromatics over the iron-based catalyst. *Fuel* **244**, 492–498 (2019).
113. Jin, Y. *et al.* Development of dual-membrane coated Fe/SiO<sub>2</sub> catalyst for efficient synthesis of isoparaffins directly from syngas. *J. Memb. Sci.* **475**, 22–29 (2015).
114. Xu, Y. *et al.* Insights into the Diffusion Behaviors of Water over Hydrophilic/Hydrophobic Catalysts During the Conversion of Syngas to High-Quality Gasoline. *Angew. Chemie* **135**, (2023).
115. Li, N. *et al.* High-Quality Gasoline Directly from Syngas by Dual Metal Oxide–Zeolite (OX-ZEO) Catalysis. *Angew. Chemie* **131**, 7478–7482 (2019).
116. Ni, Y. *et al.* Realizing high conversion of syngas to gasoline-range liquid hydrocarbons on a dual-bed-mode catalyst. *Chem Catal.* <https://doi.org/10.1016/j.checat.2021.02.003> (2021)  
doi:10.1016/j.checat.2021.02.003.
117. Kianfar, E., Hajimirzaee, S., mousavian, S. & Mehr, A. S. Zeolite-based catalysts for methanol to gasoline process: A review. *Microchem. J.* **156**, 104822 (2020).
